# Supplementary material for: Investigating the Host-Range of the Rust Fungus Puccinia psidii sensu lato across Tribes of the Family Myrtaceae Present in Australia
Source: PubMed Central journal article supplement (PMC3327671; doi:10.1371/journal.pone.0035434), 2012-04-16
Supplement: pone.0035434.s002.pdf [file pone.0035434.s002.pdf]

**Figure S1. Photographs of the most developed uredinia produced on the various taxa.**

Photographs of the most developed uredinia produced on the various taxa at three weeks after inoculation with *Puccinia psidii* s.l. (ex Australia, DAR81284).

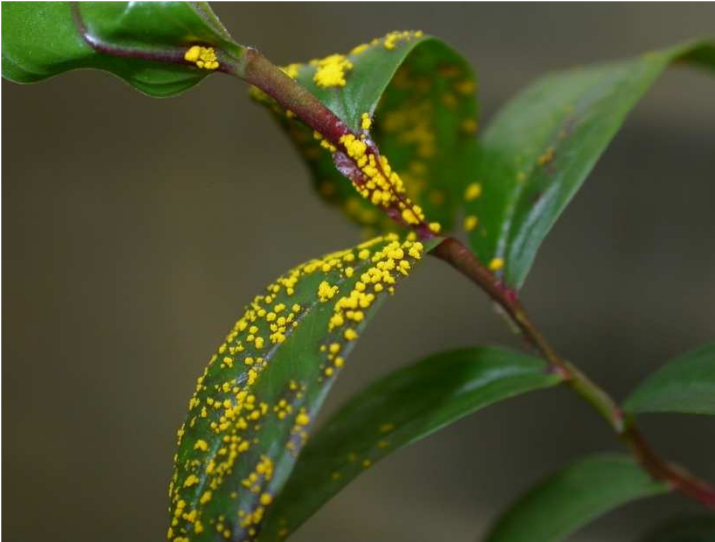

*Agonis flexuosa* 'Afterdark'

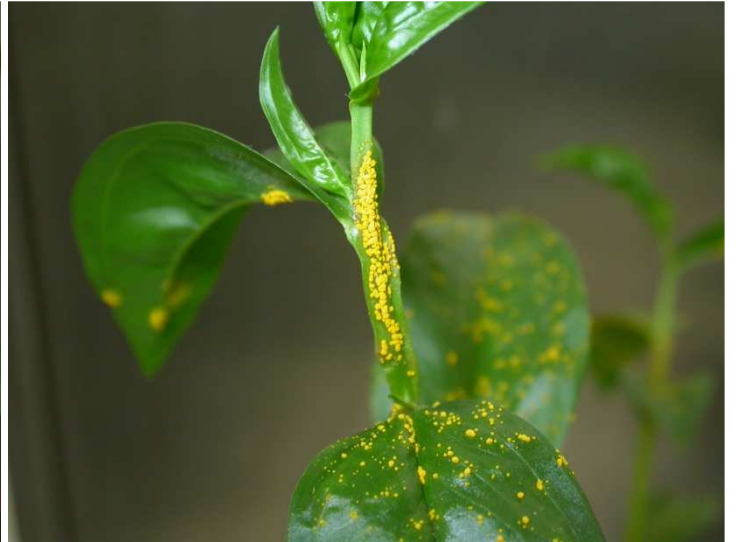

*Agonis flexuosa* (wild accession)

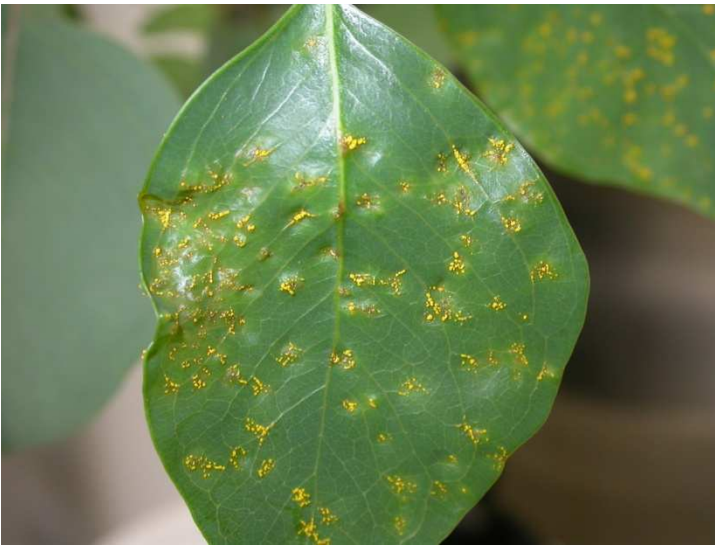

*Allosyncarpia ternata*

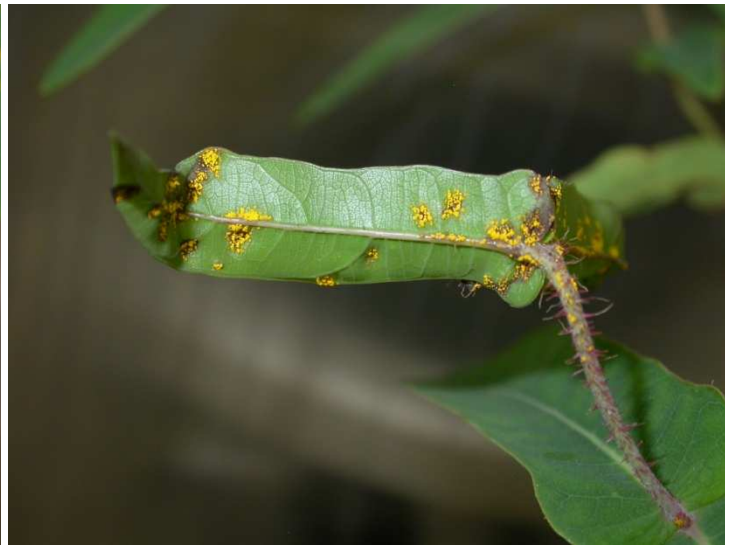

*Angophora costata*

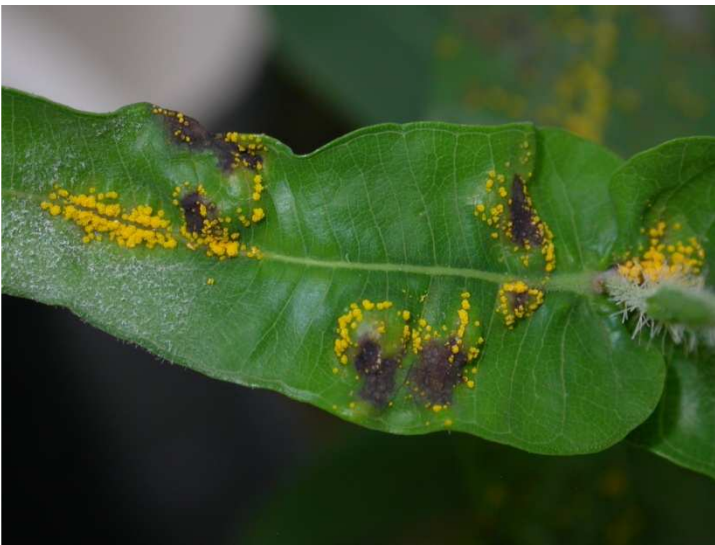

*Angophora floribunda*

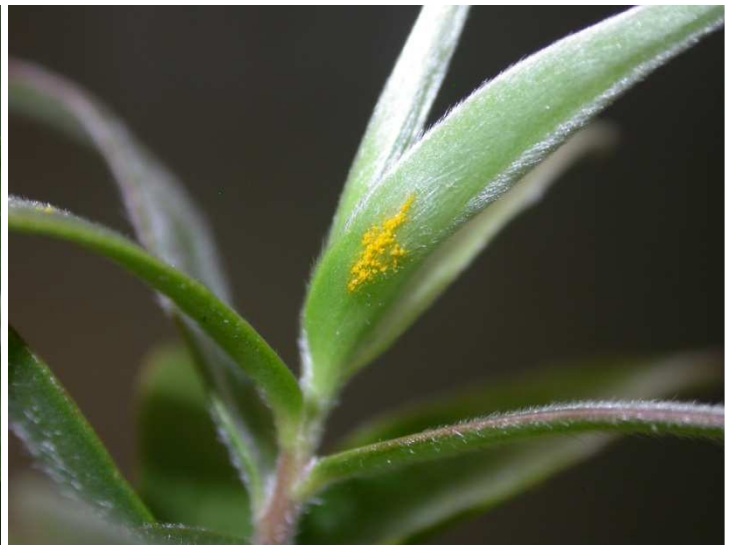

*Asteromyrtus magnifica*

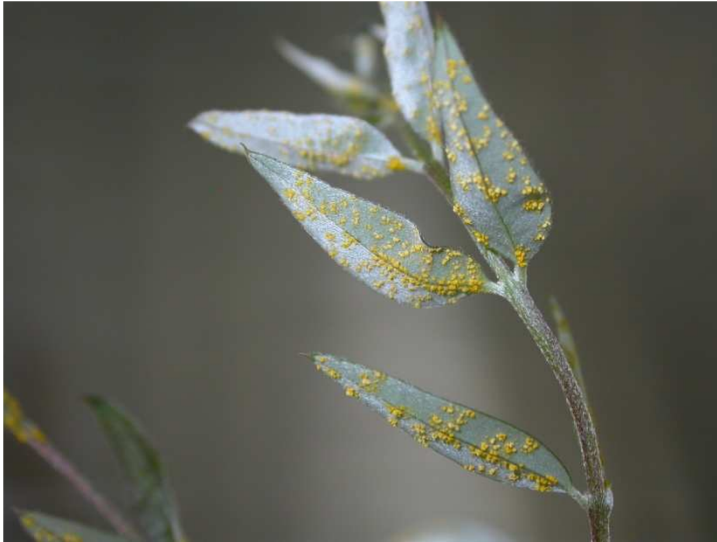

*Austromyrtus dulcis*

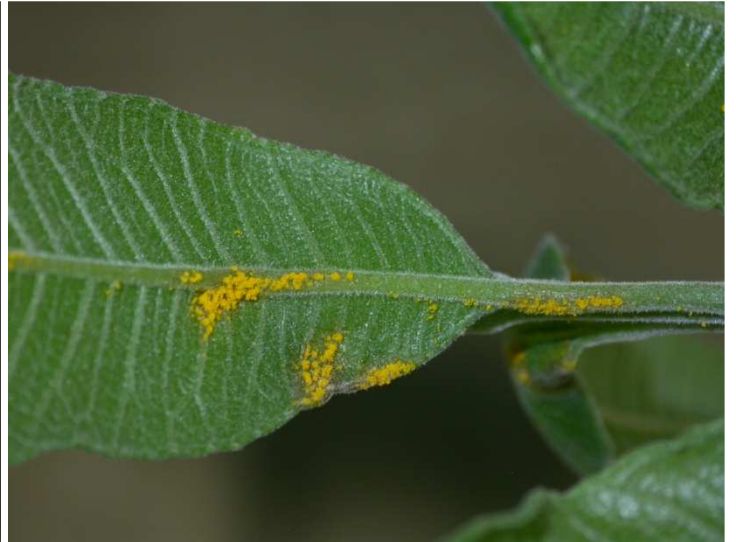

*Backhousia citriodora*

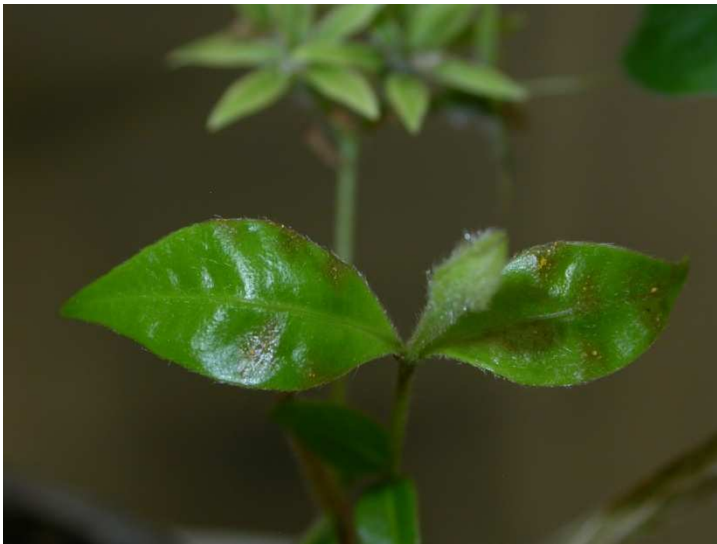

*Backhousia myrtifolia*

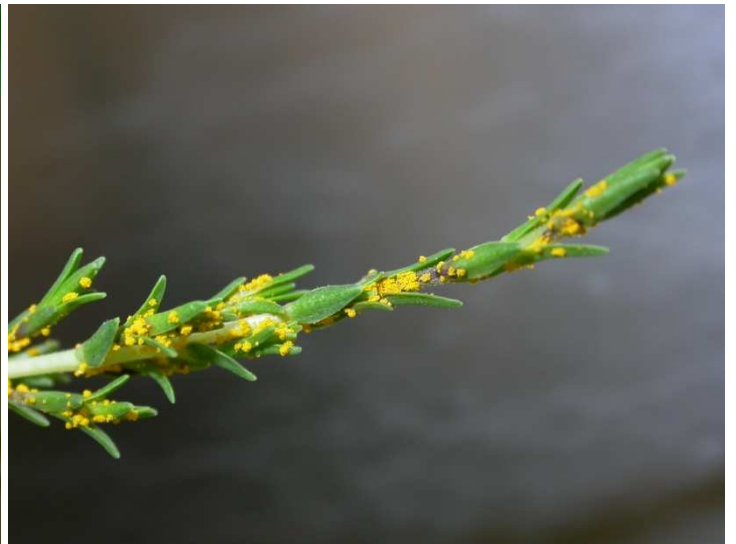

*Beaufortia schaueri*

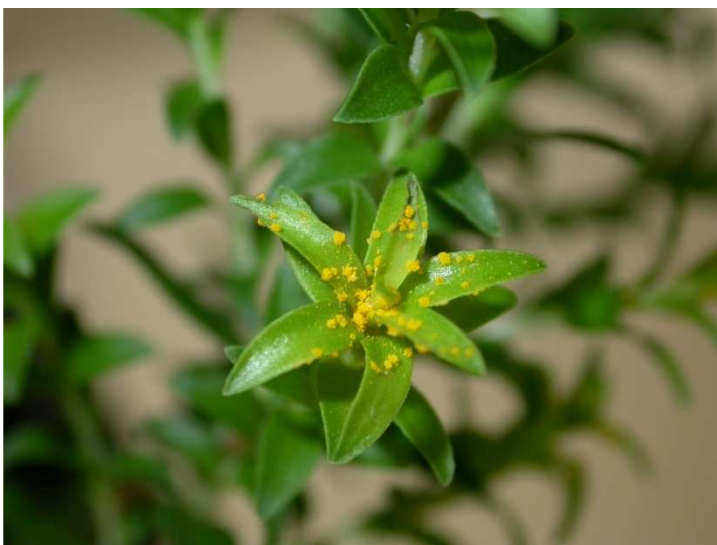

*Beaufortia sparsa*

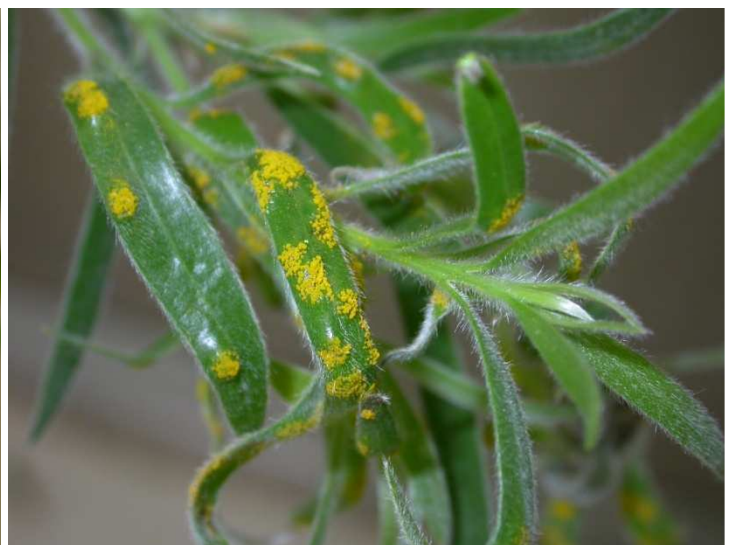

*Callistemon 'Hannah Ray'*

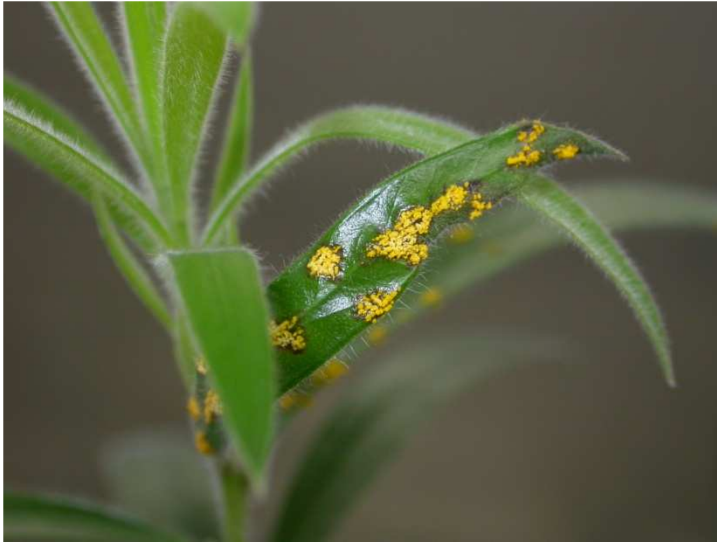

*Callistemon 'Kings Park Special'*

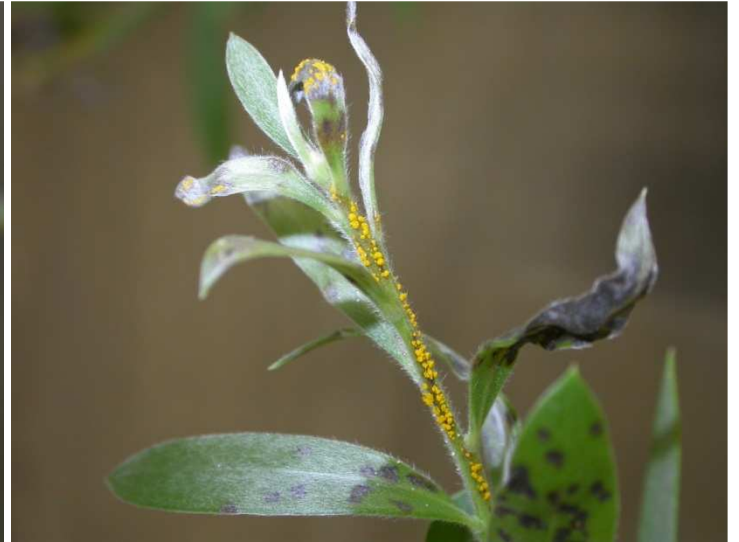

*Callistemon citrinus 'White Anzac'*

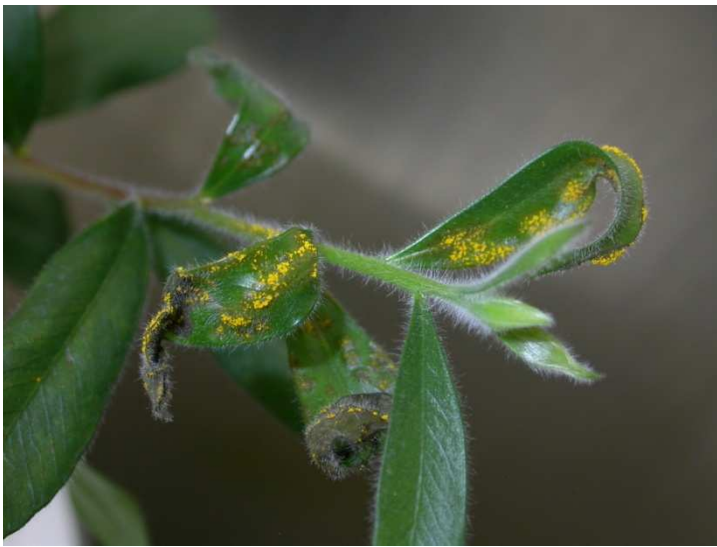

*Callistemon linearifolius*

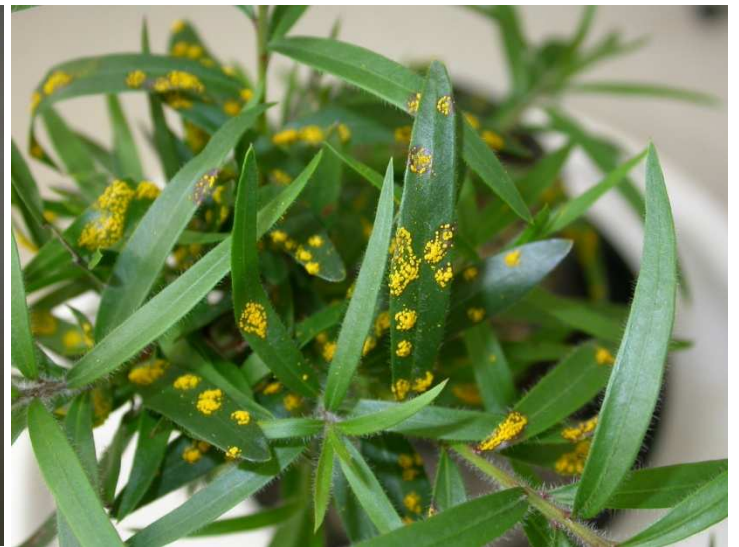

*Callistemon viminalis*

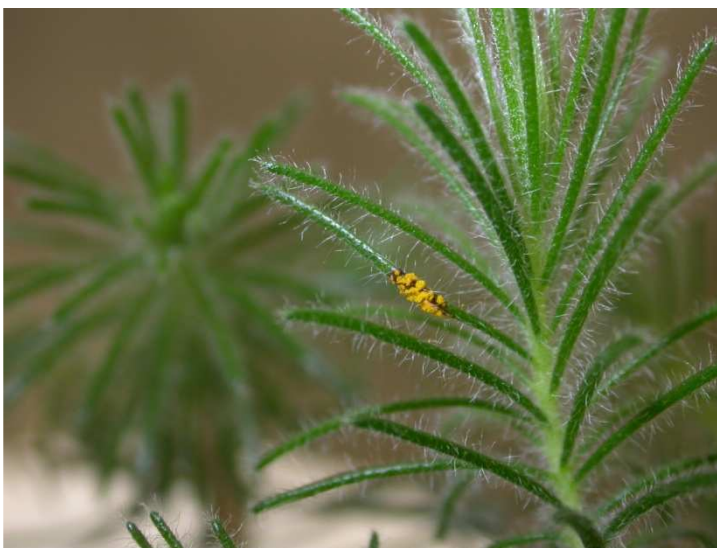

*Calothamnus quadrifidus*

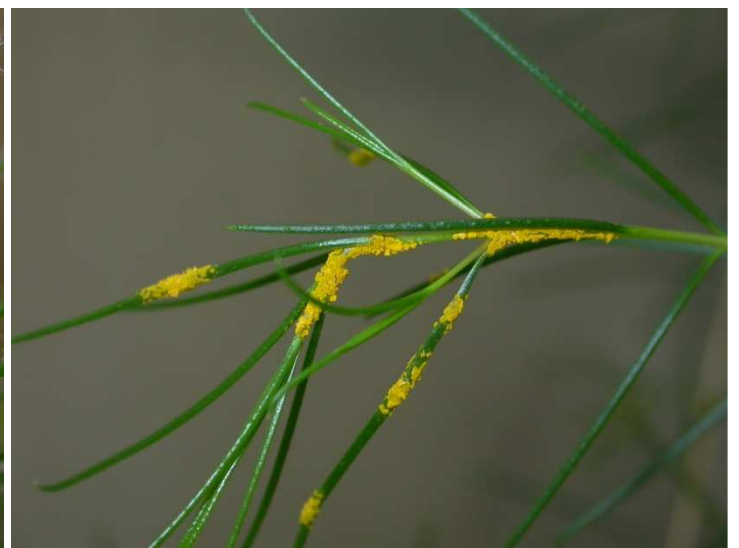

*Chamelaucium uncinatum*

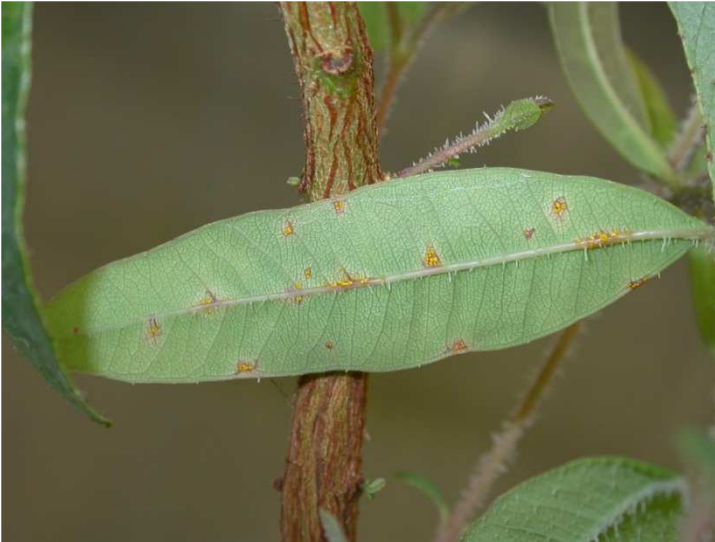

*Corymbia citriodora* (accession no 1)

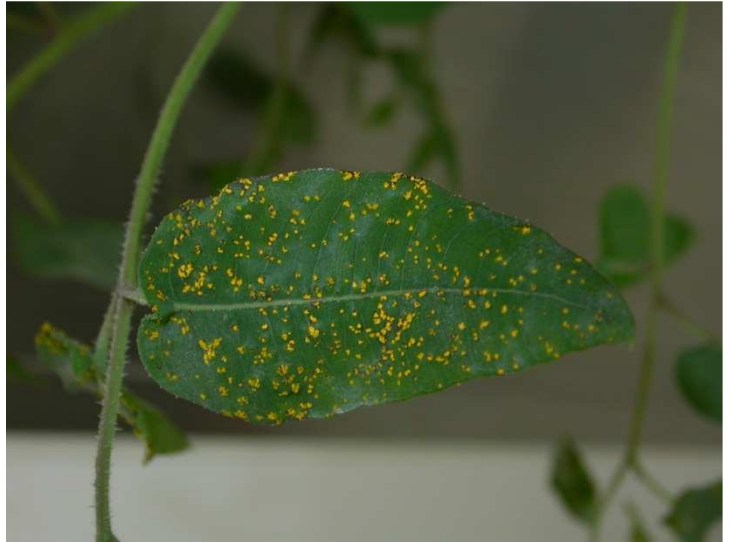

*Corymbia citriodora* (accession no 2)

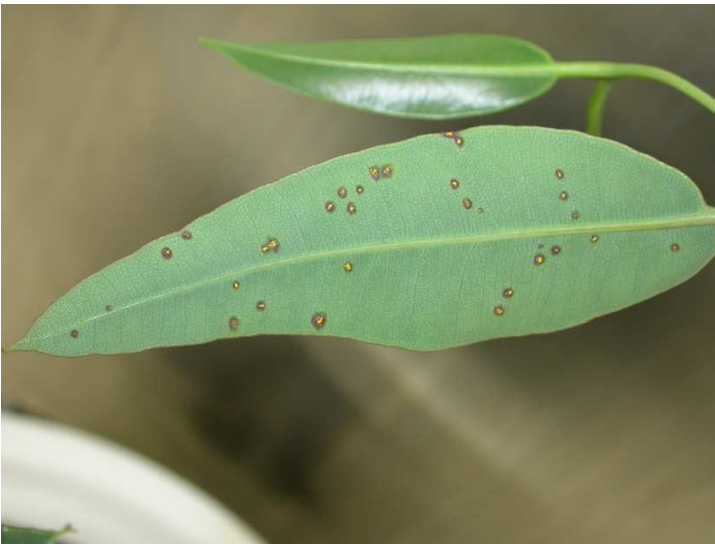

*Corymbia ficifolia*

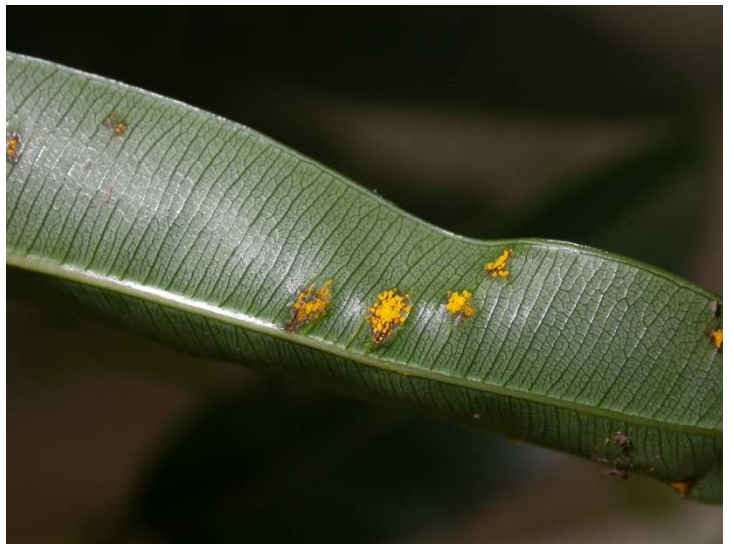

*Corymbia gummifera*

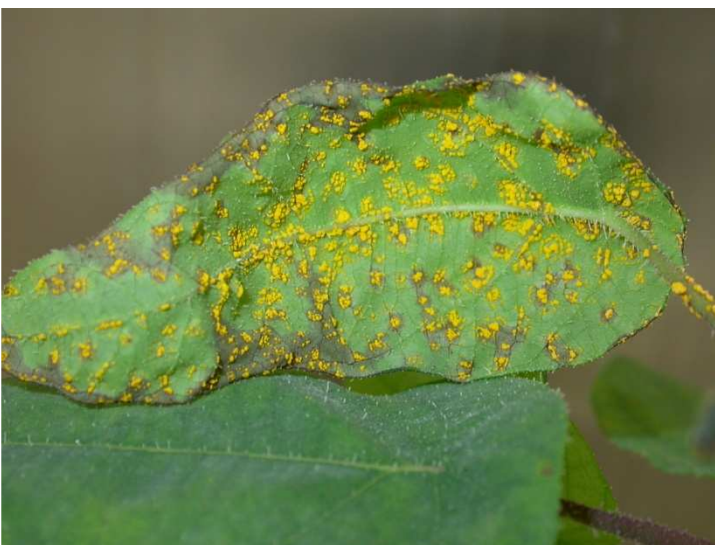

*Corymbia henryi*

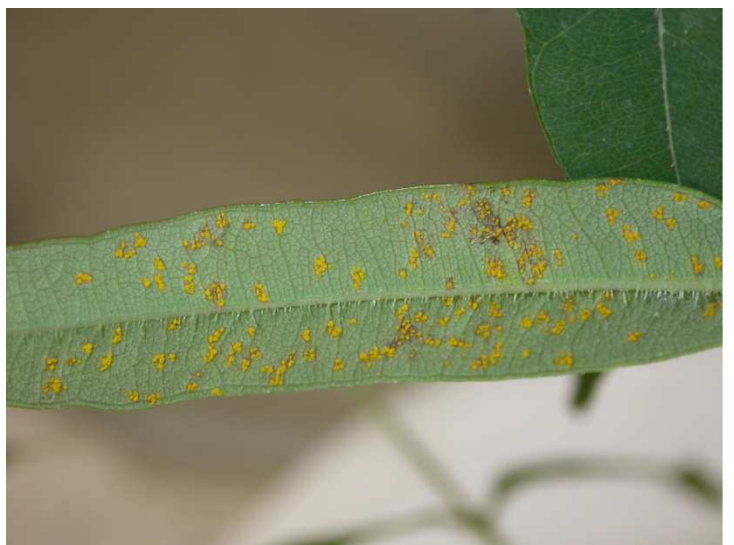

*Corymbia intermedia*

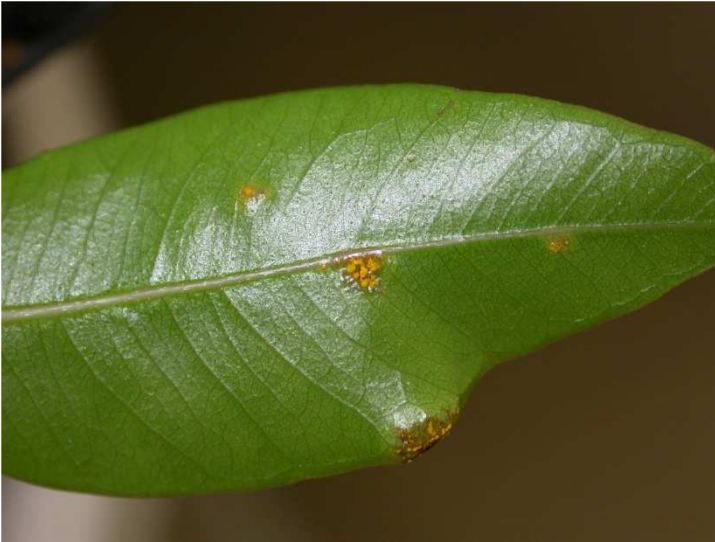

*Corymbia maculata*

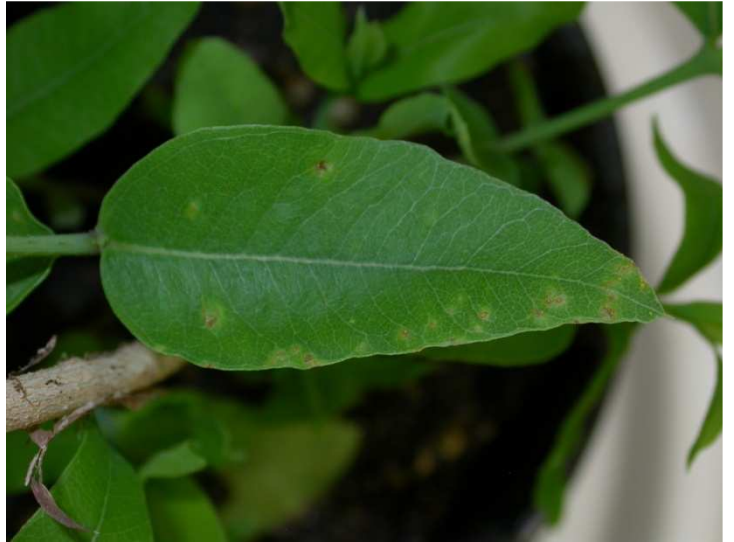

*Corymbia tessellaris*

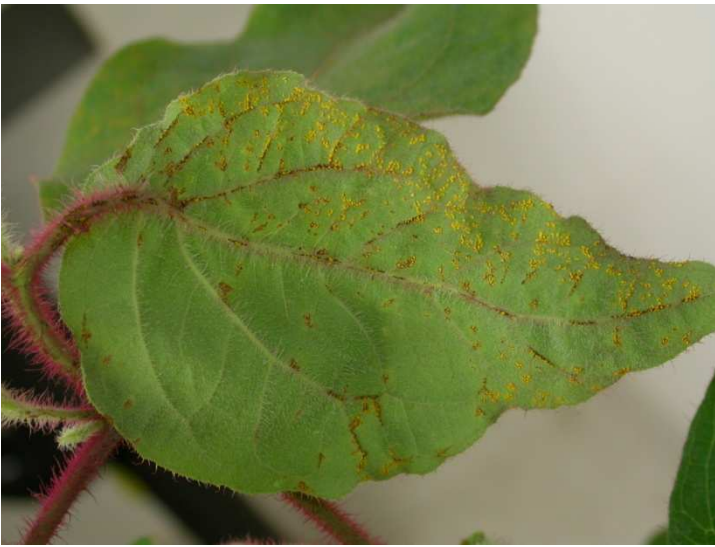

*Corymbia torelliana*

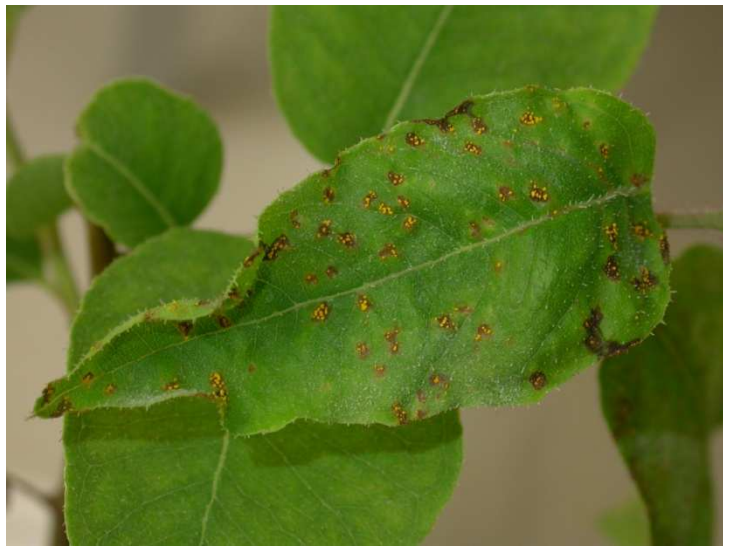

*Corymbia variegata x torelliana*

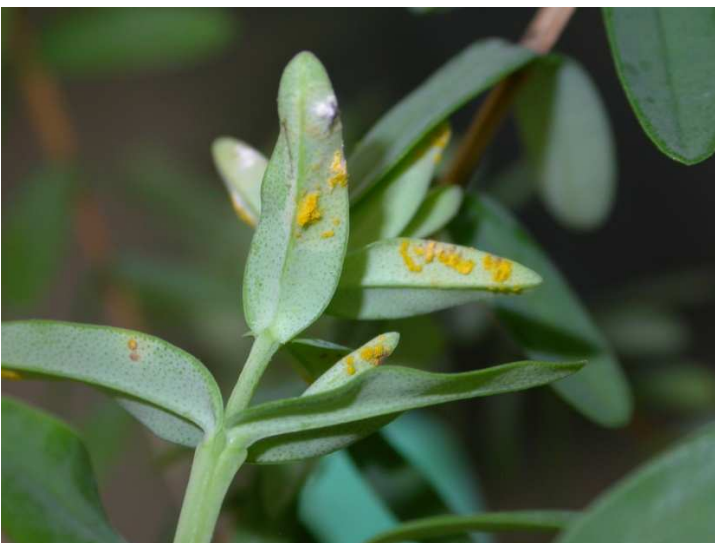

*Darwinia citriodora*

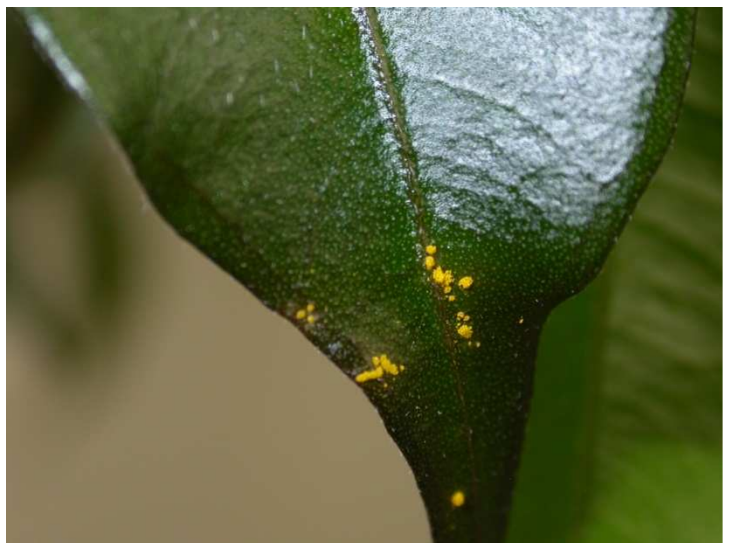

*Decaspermum humile*

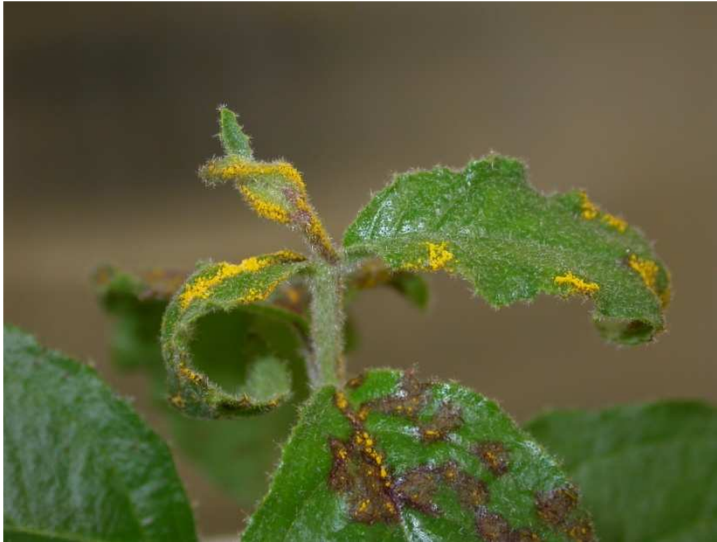

*Eucalyptus agglomerata*

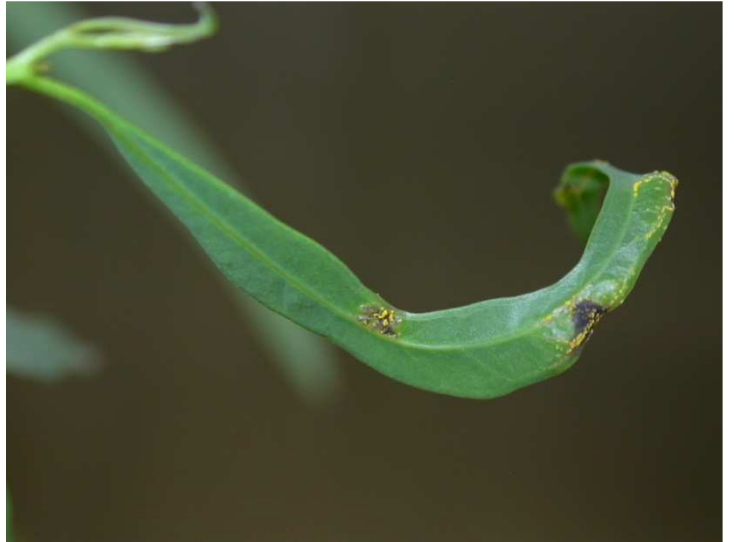

*Eucalyptus argophloia*

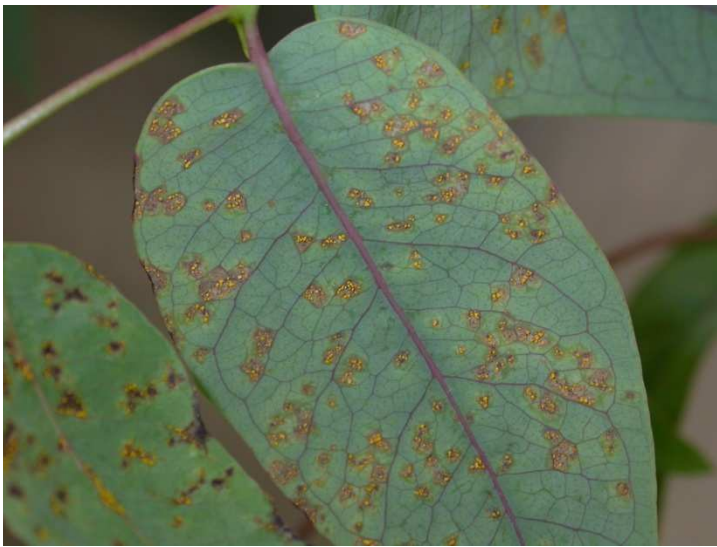

*Eucalyptus campanulata*

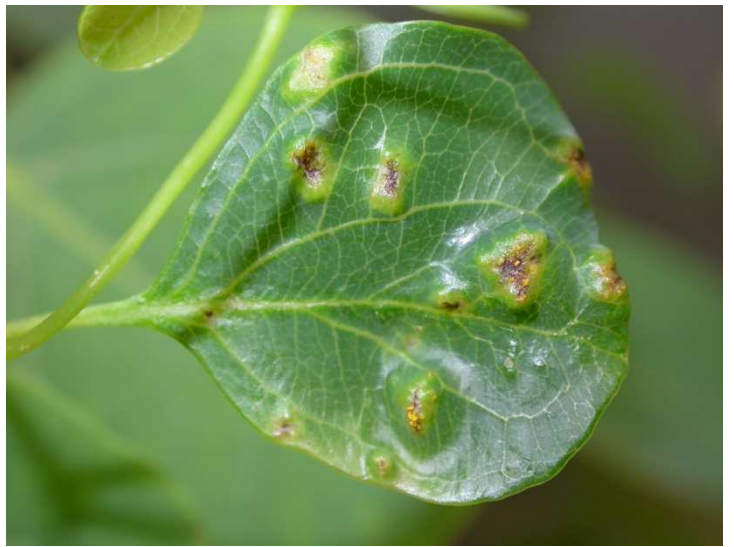

*Eucalyptus cladocalyx*

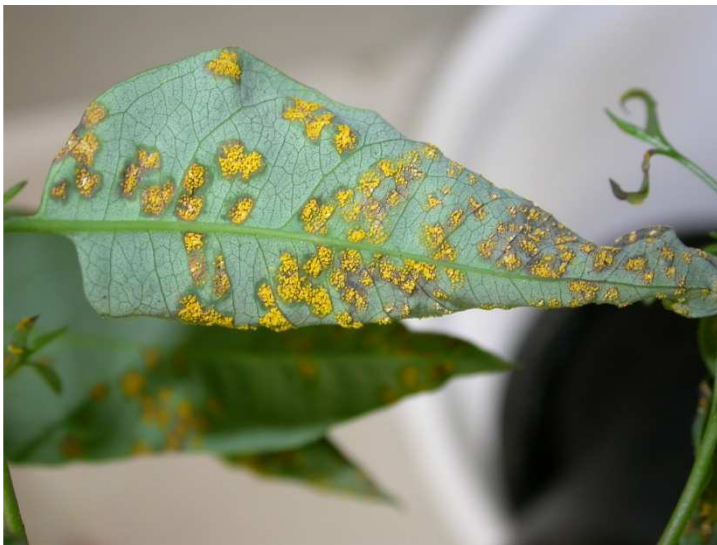

*Eucalyptus cloeziana*

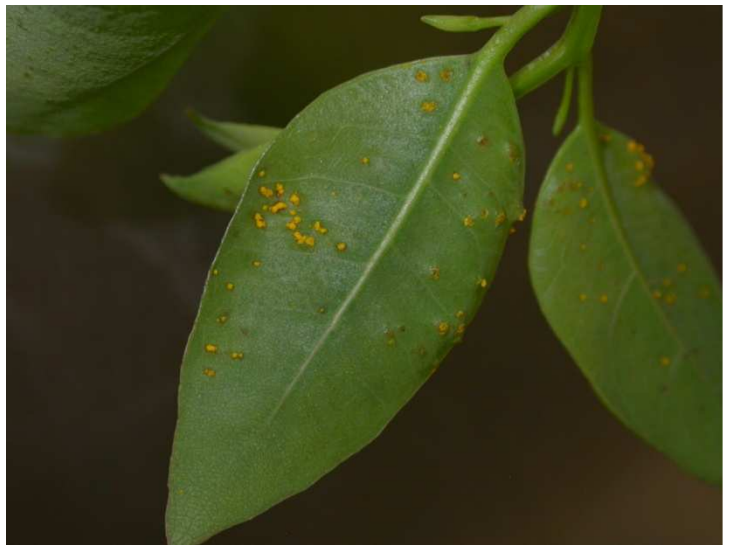

*Eucalyptus diversicolor*

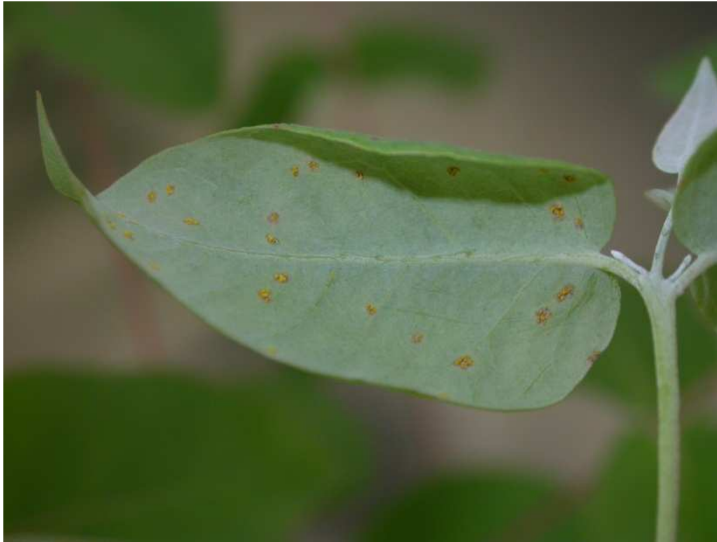

*Eucalyptus dunnii*

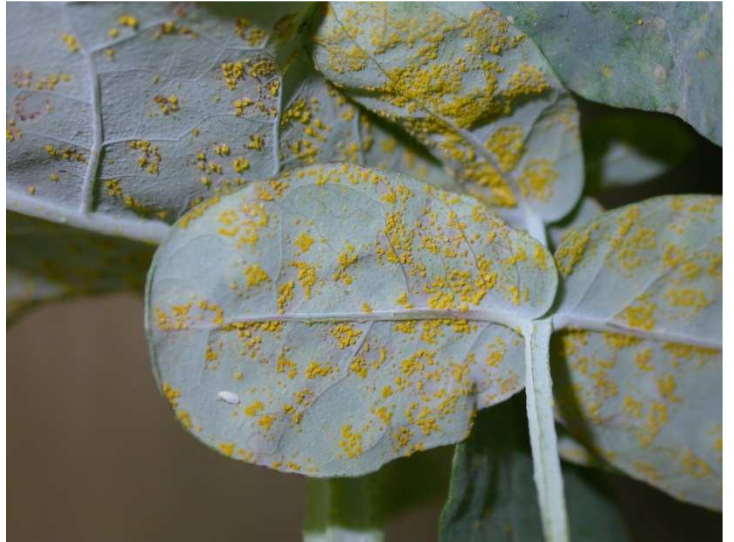

*Eucalyptus globulus* subsp. *bicostata*

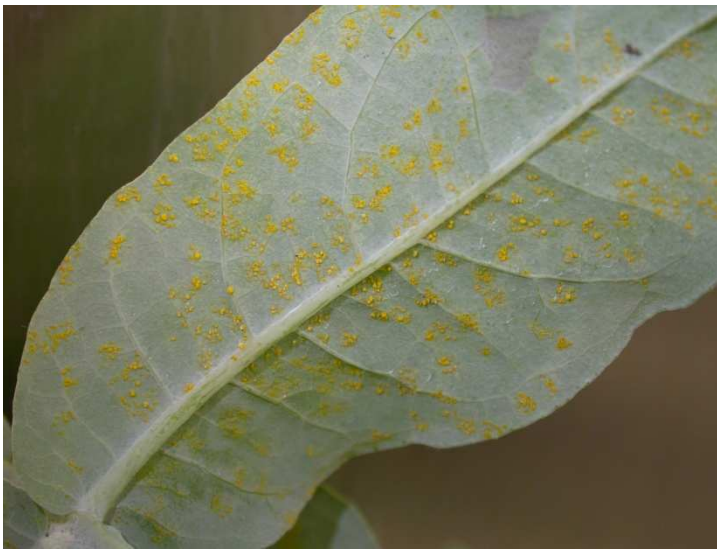

*Eucalyptus globulus* subsp. *globulus*

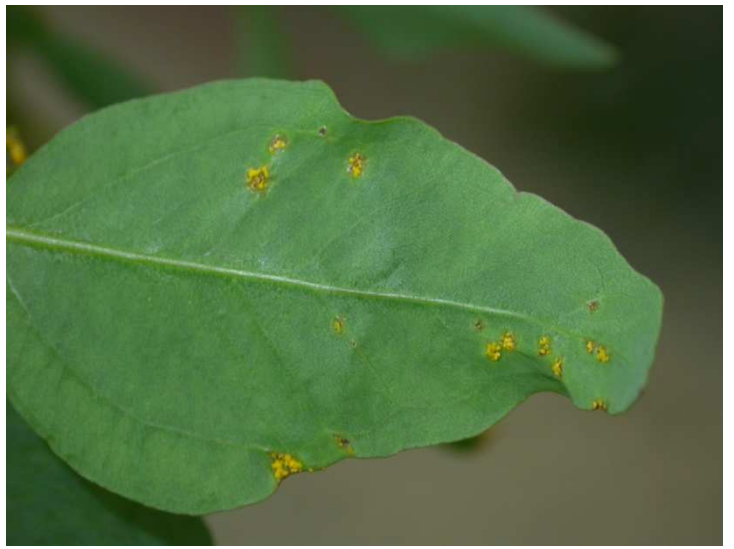

*Eucalyptus gomphocephala*

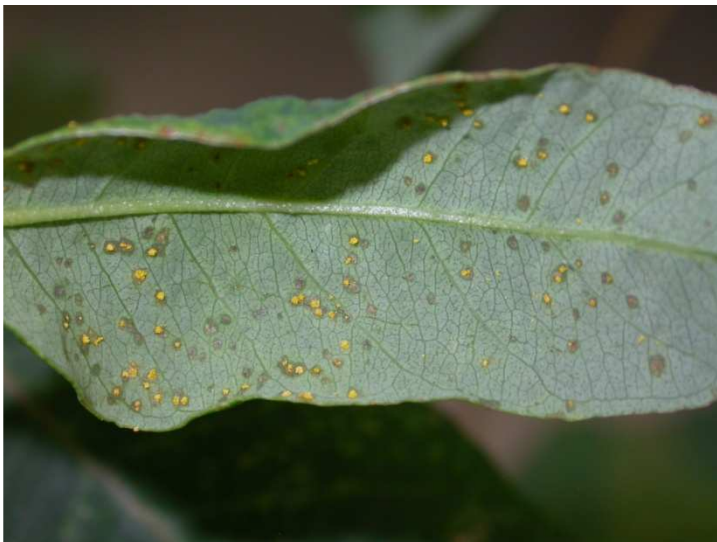

*Eucalyptus grandis*

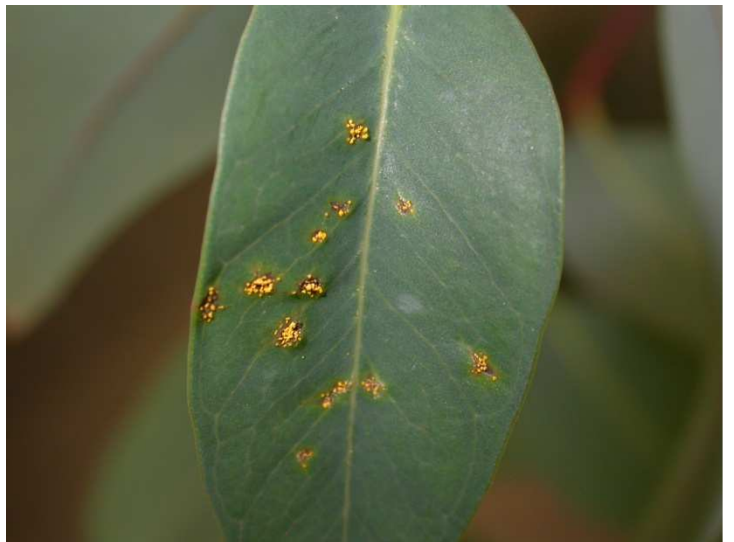

*Eucalyptus haemastoma*



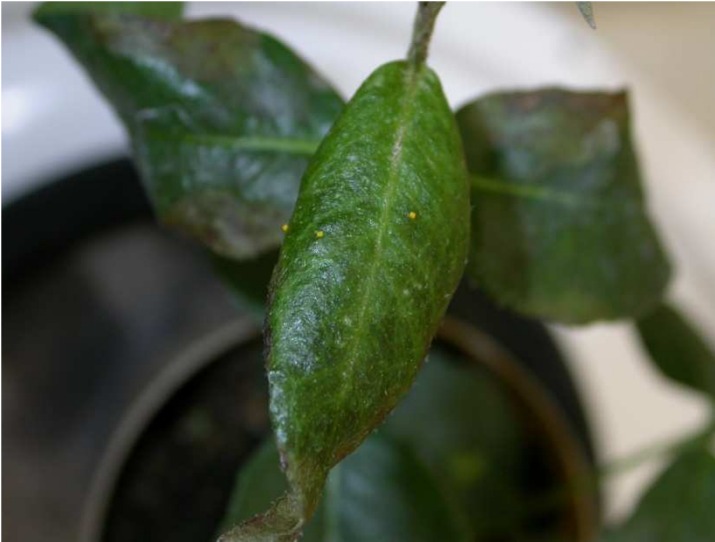

*Eucalyptus laevopinea*

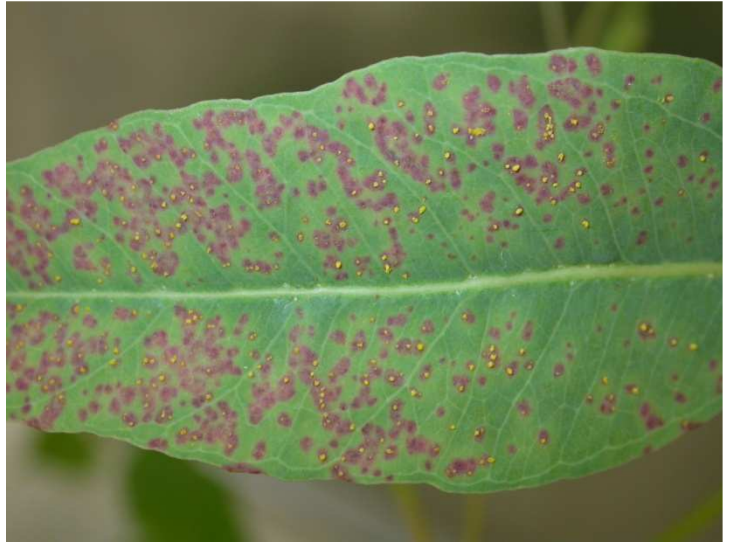

*Eucalyptus longirostrata*

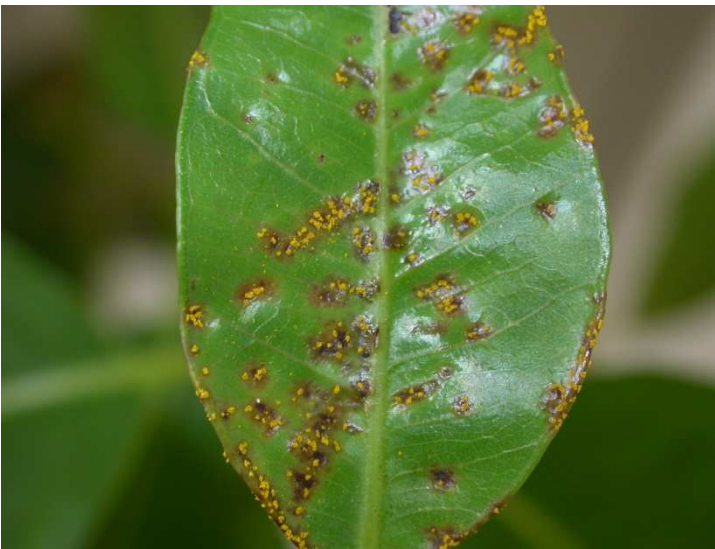

*Eucalyptus marginata* subsp. *marginata*

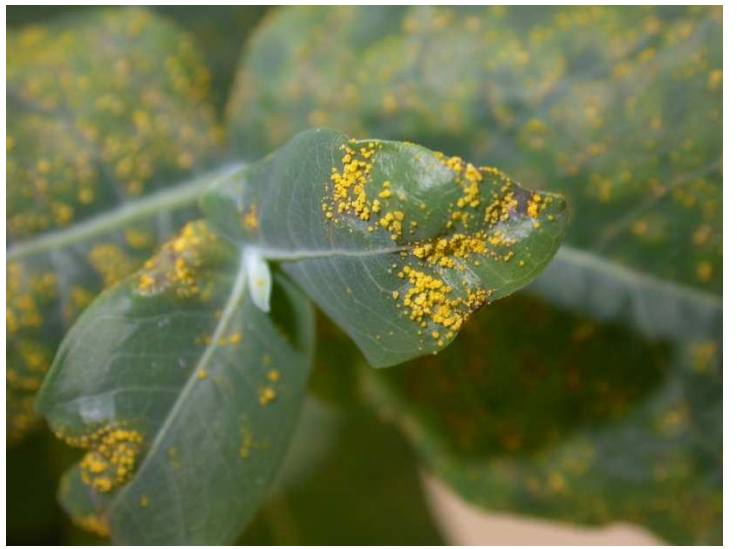

*Eucalyptus nitens*

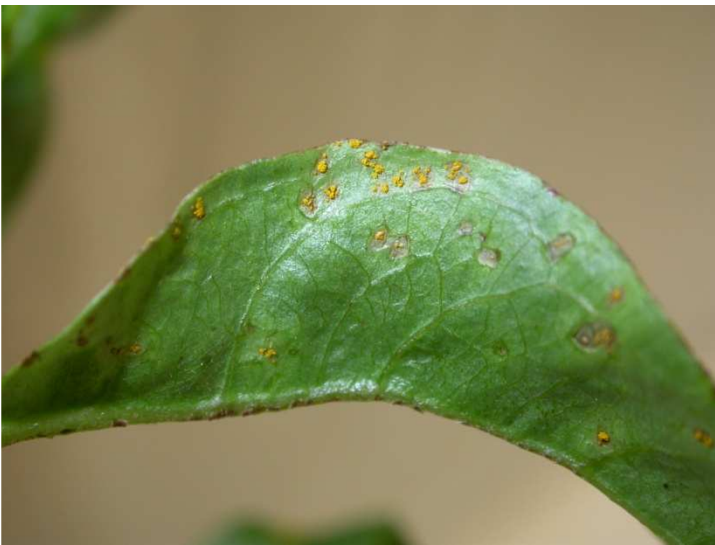

*Eucalyptus obliqua*

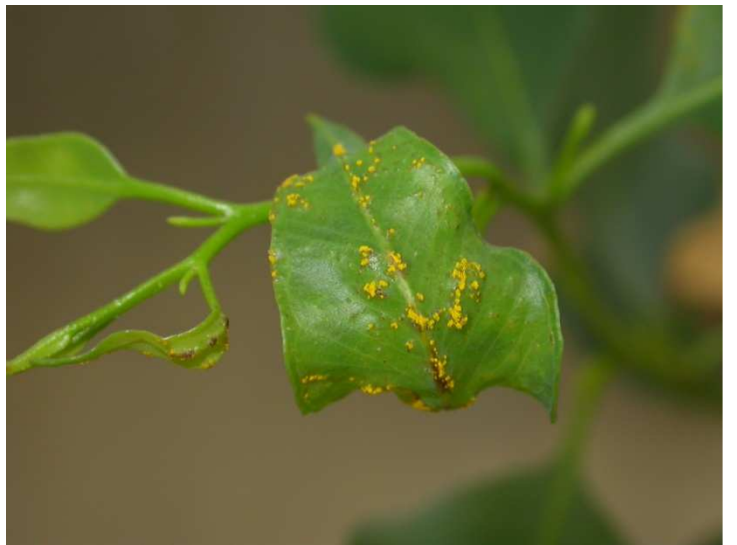

*Eucalyptus occidentalis*

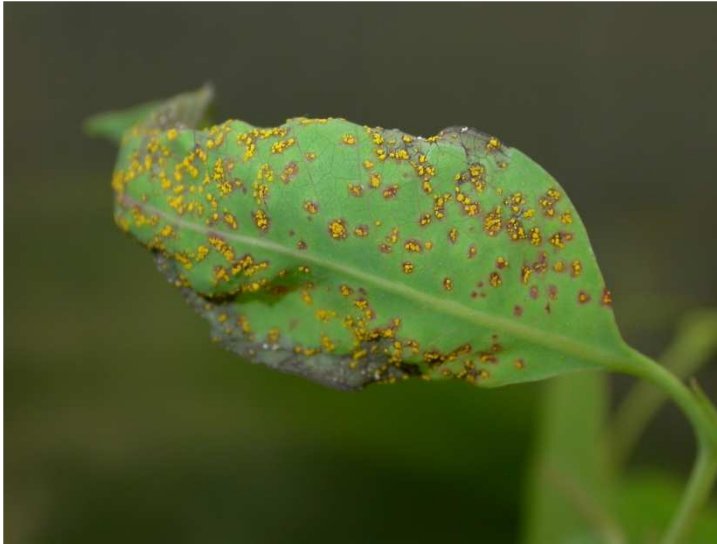

*Eucalyptus olida*

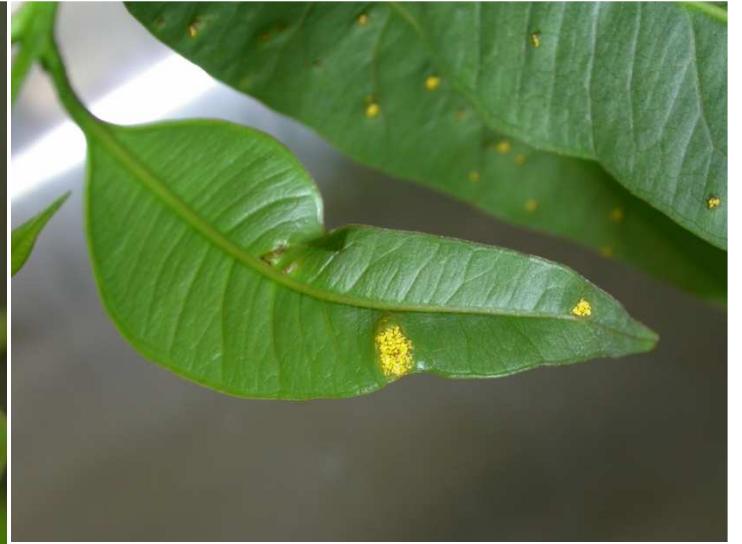

*Eucalyptus pellita*

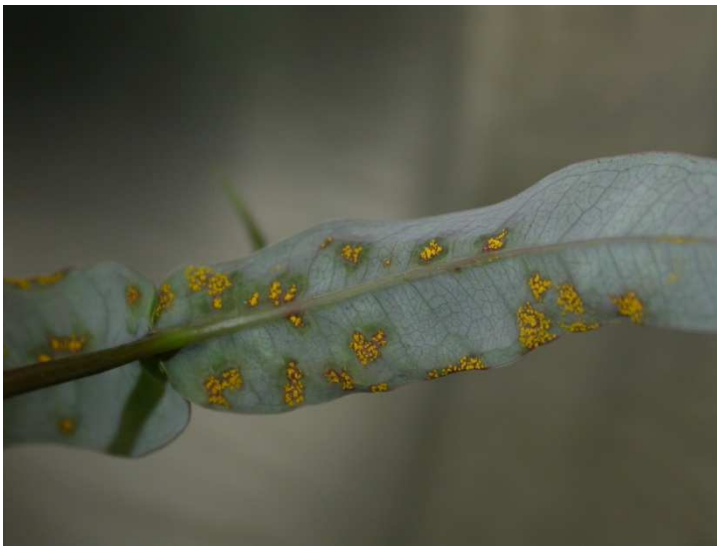

*Eucalyptus pilularis*

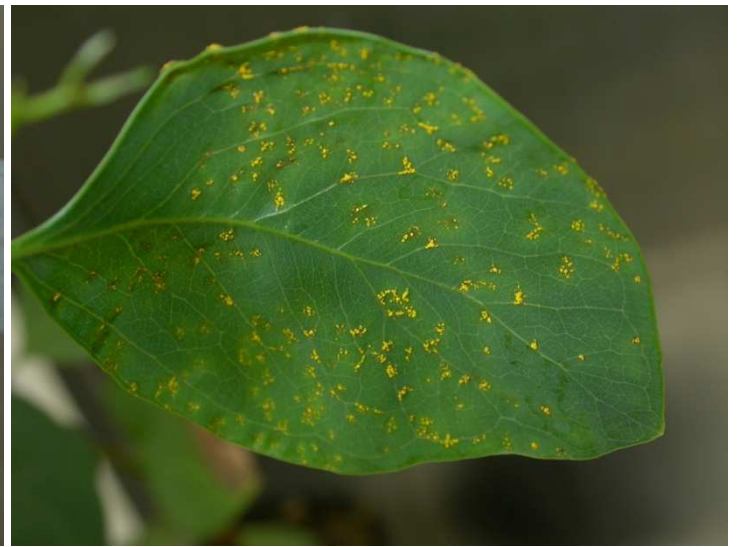

*Eucalyptus populnea*

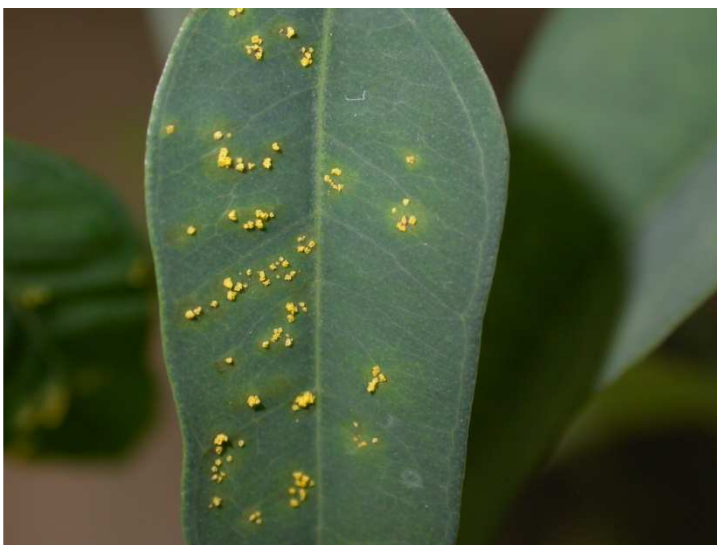

*Eucalyptus punctata*

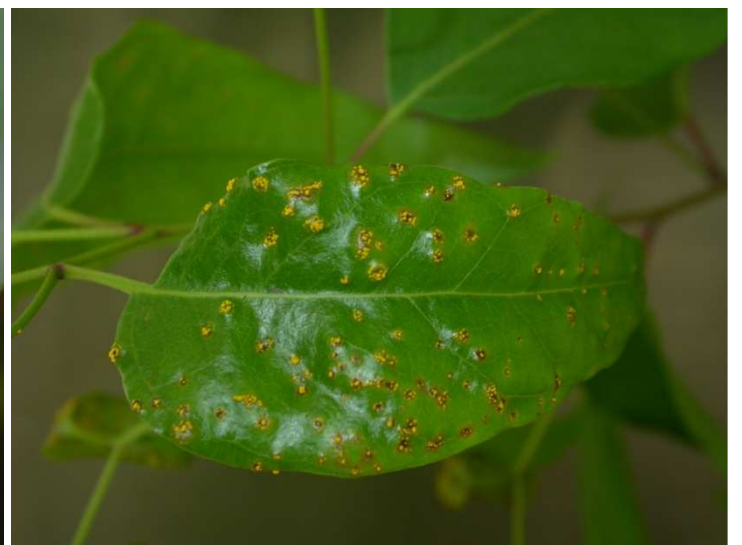

*Eucalyptus regnans*

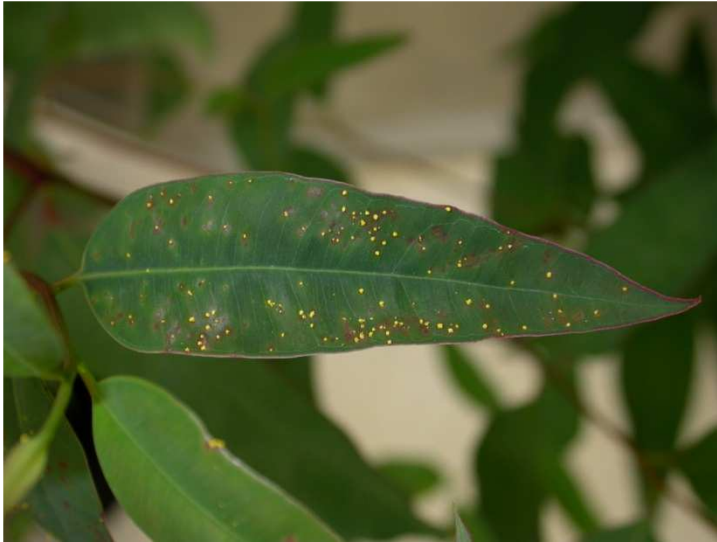

*Eucalyptus resinifera* subsp. *hemilampra*

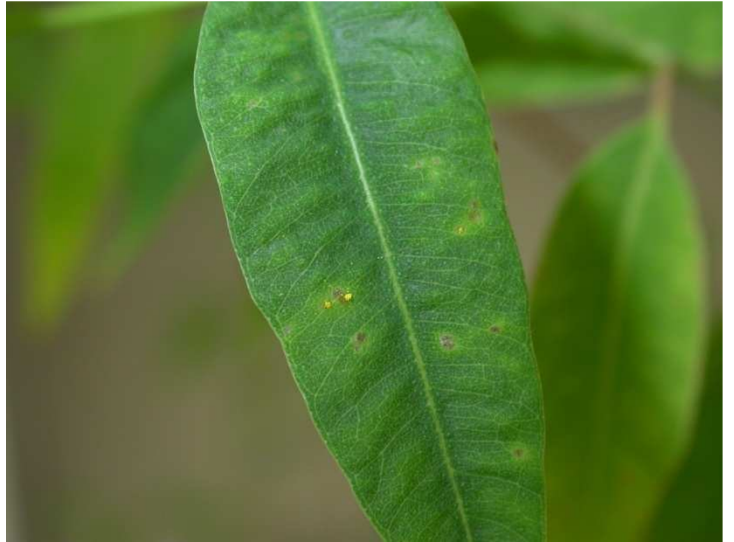

*Eucalyptus saligna*

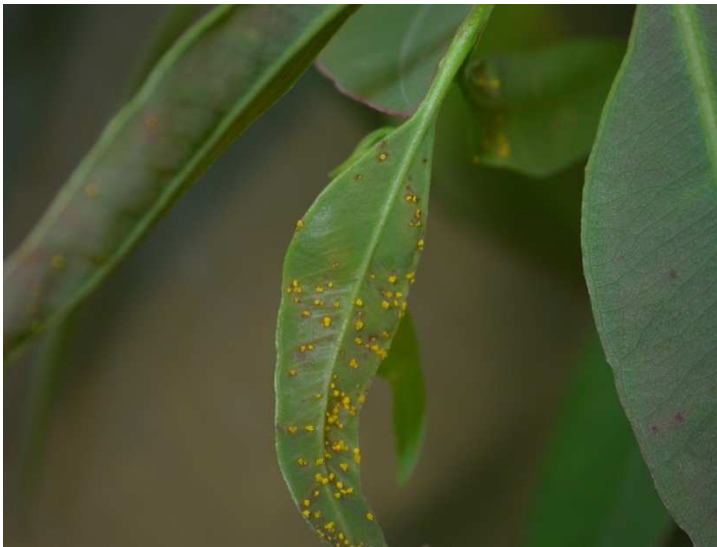

*Eucalyptus siderophloia*

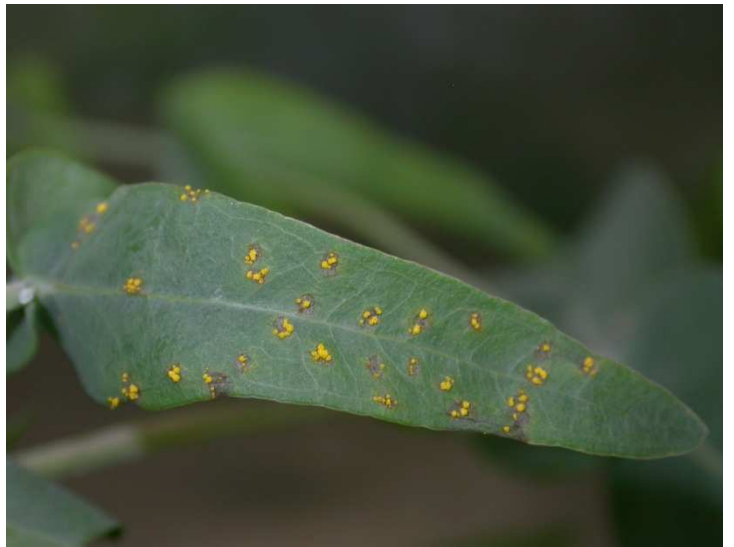

*Eucalyptus smithii*

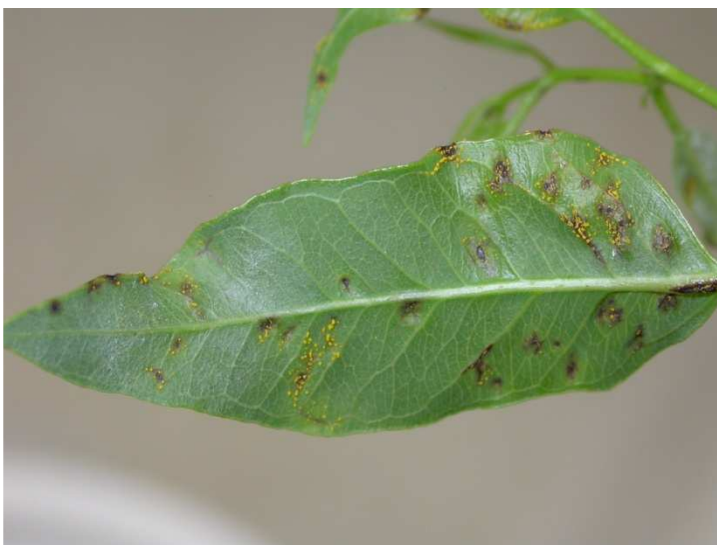

*Eucalyptus tereticornis*

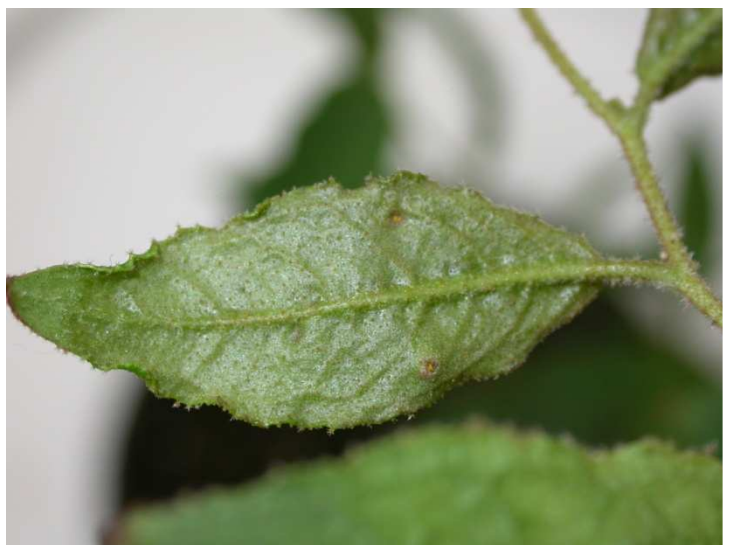

*Eucalyptus tindaliae*

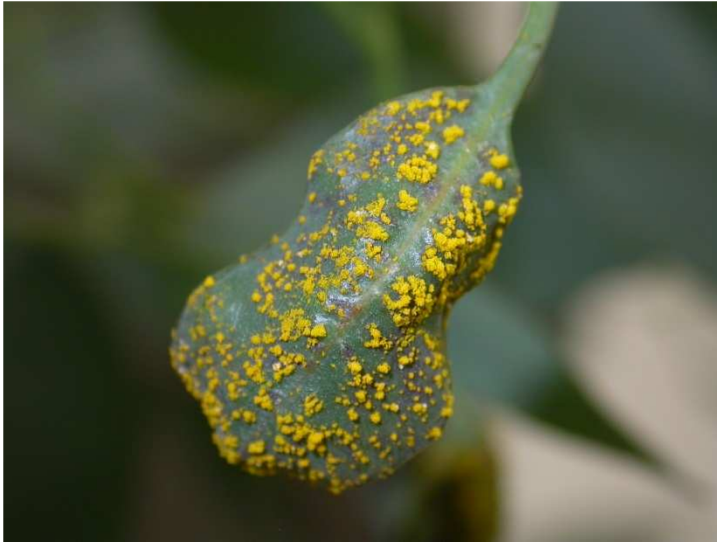

*Eucalyptus wandoo* subsp. *wandoo*

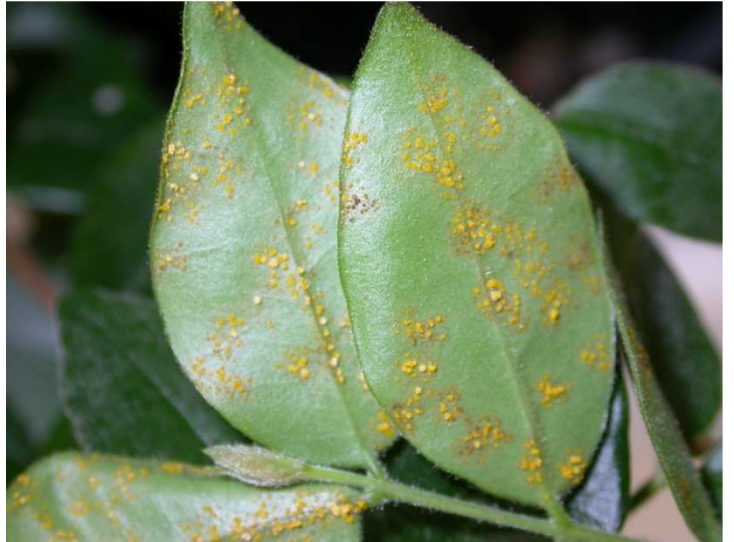

*Gossia inophloia*

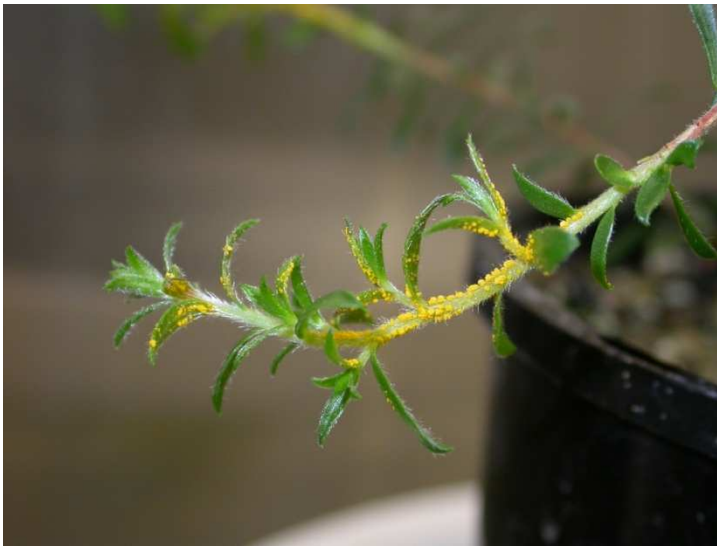

*Kunzea ambigua* hybrid

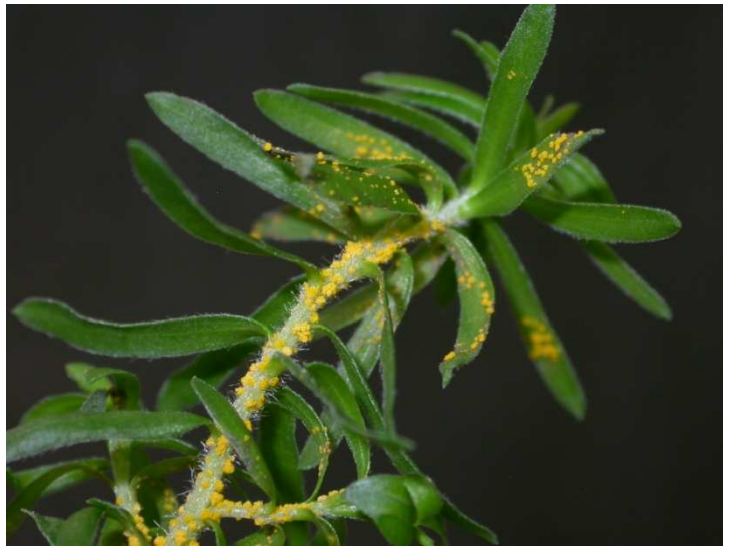

*Kunzea baxteri*

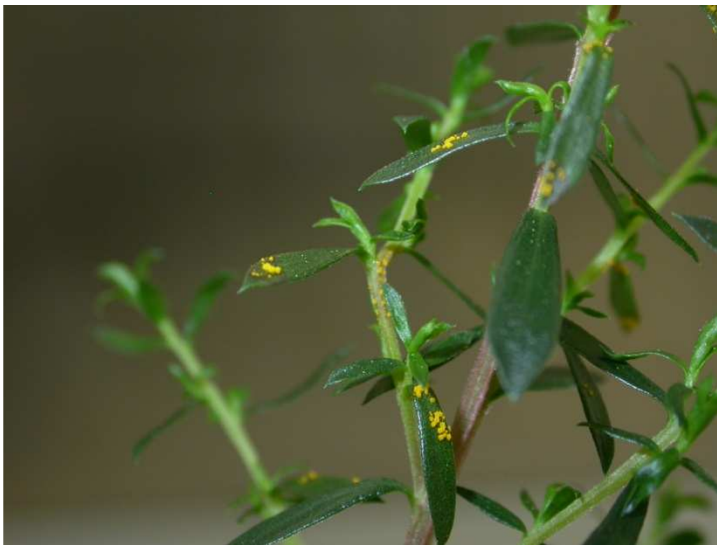

*Kunzea ericoides*

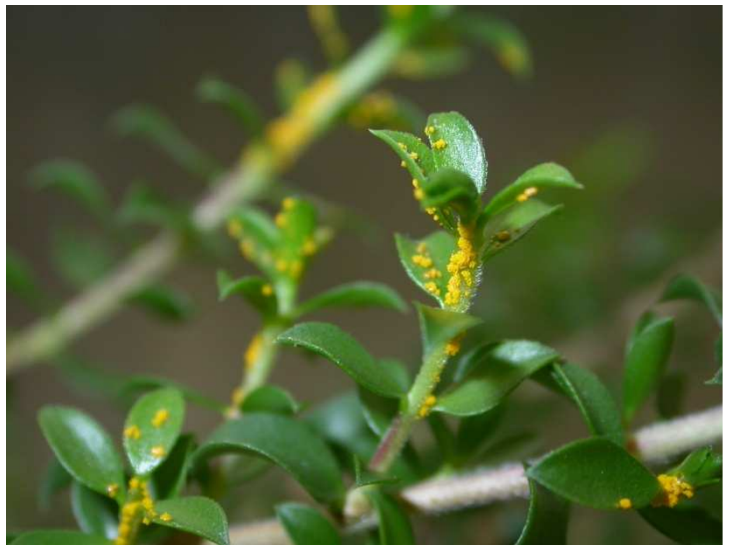

*Kunzea pomifera*

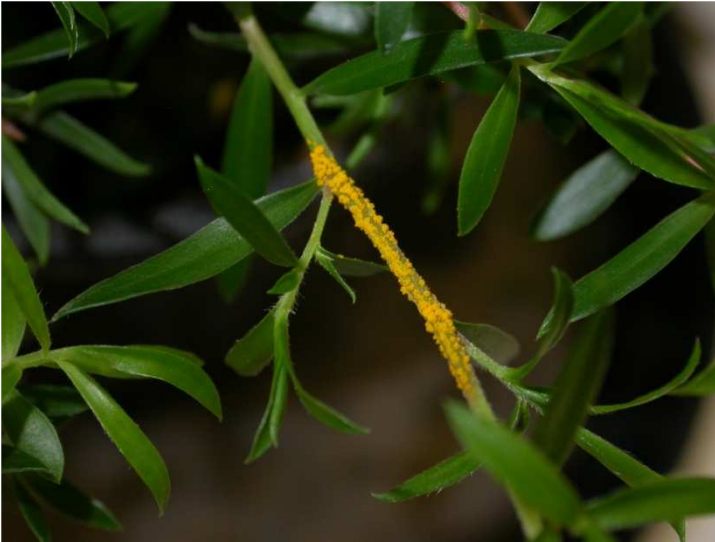

*Leptospermum* 'Day Dream'

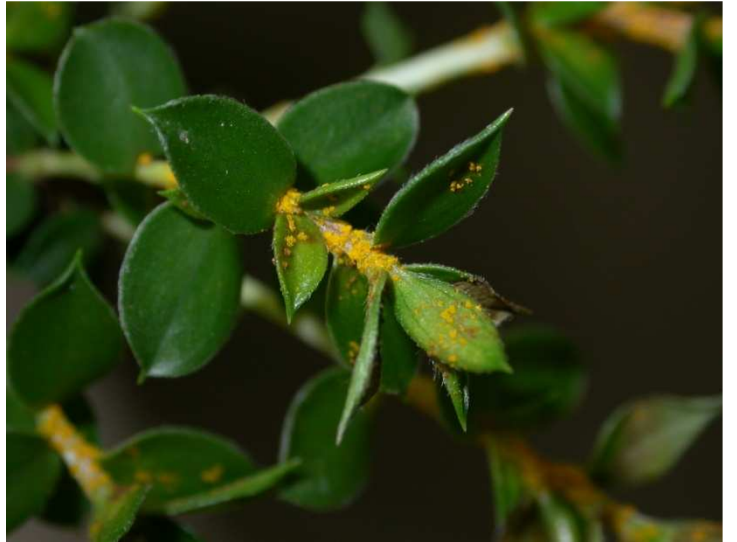

*Leptospermum continentale* 'Horizontalis'

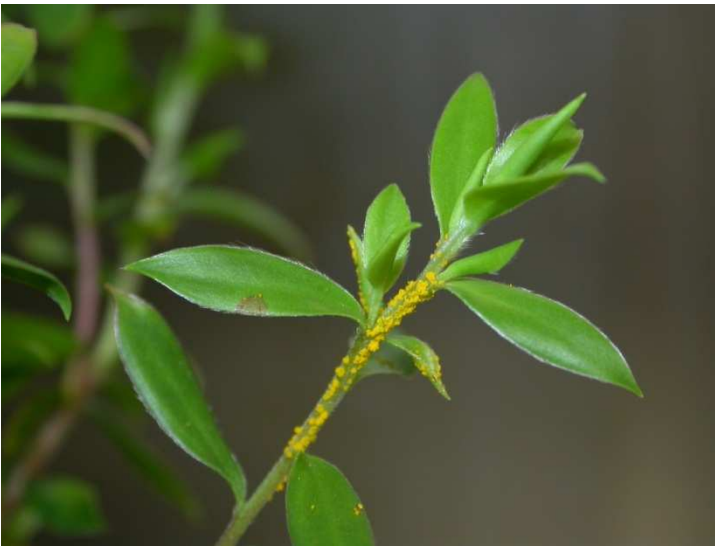

*Leptospermum* 'Lipstick'

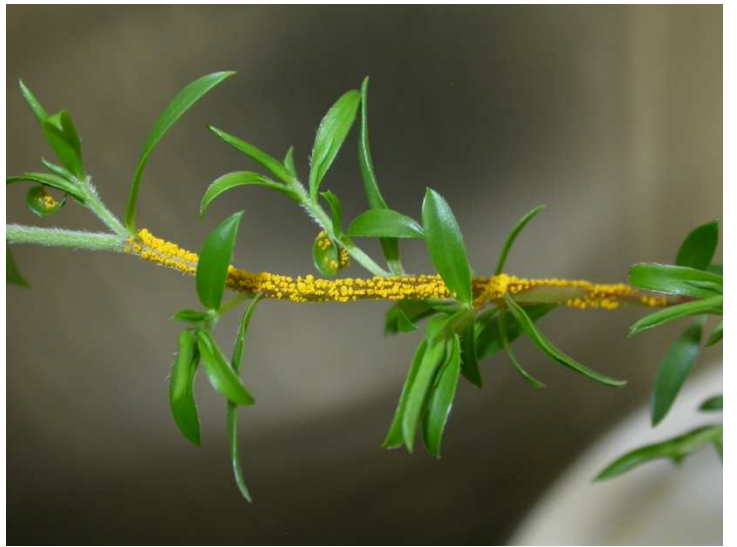

*Leptospermum* 'Love Affair'

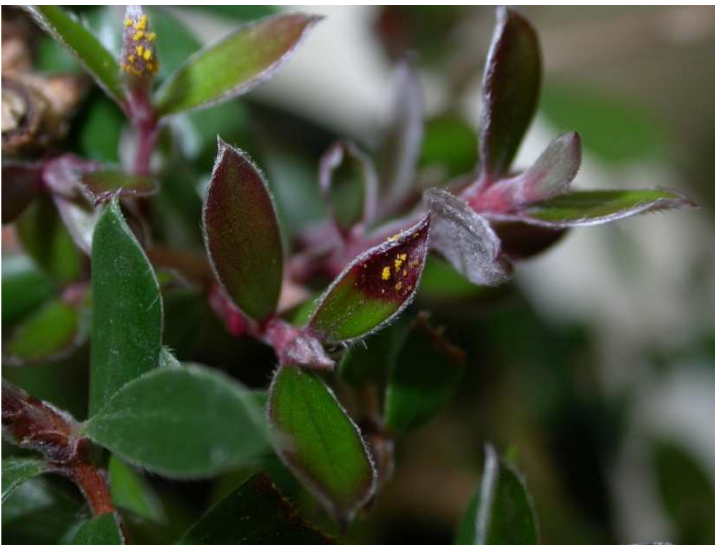

*Leptospermum* 'Mesmer Eyes'

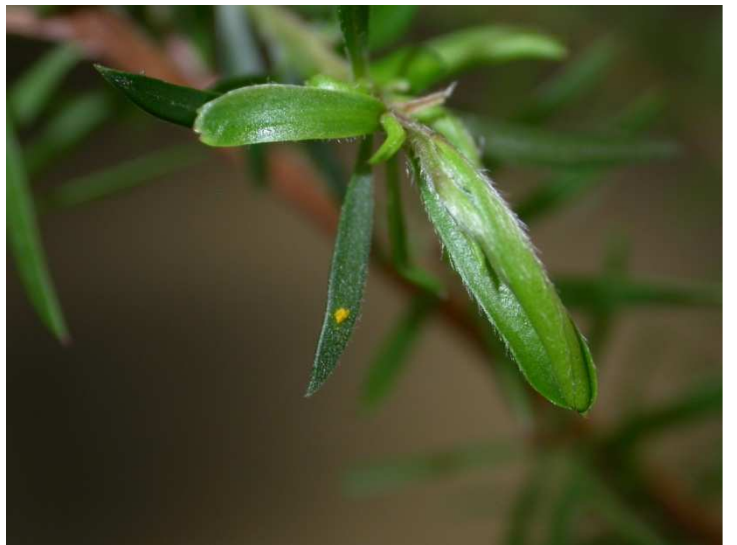

*Leptospermum* 'Pink Cascade'

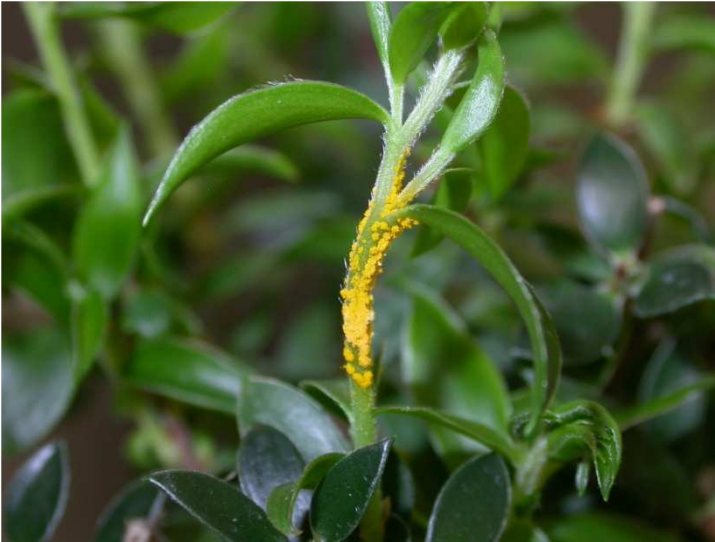

*Leptospermum 'Rhiannon'*

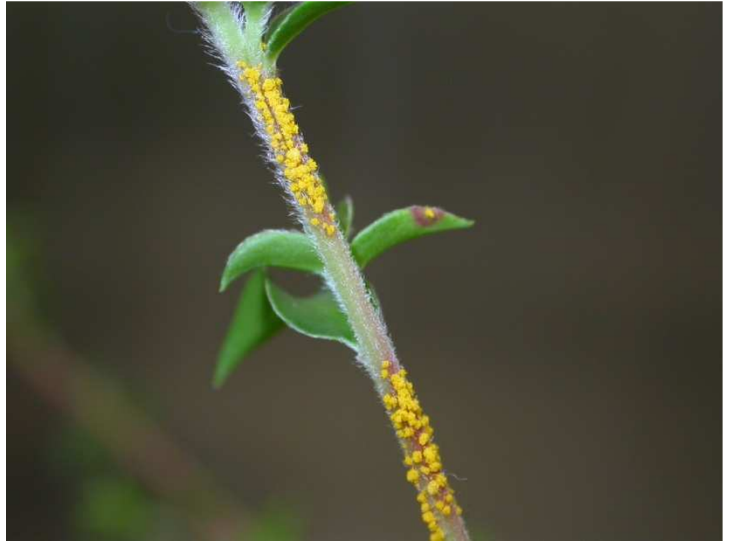

*Leptospermum 'Riot'*

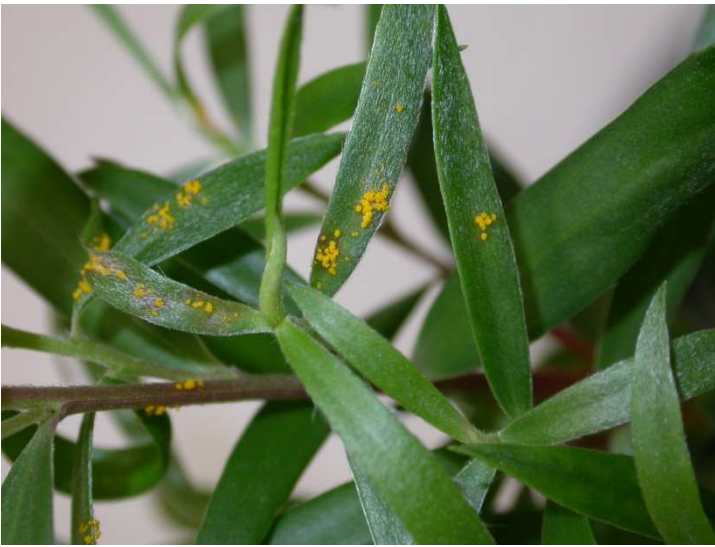

*Leptospermum 'Rudolph'*

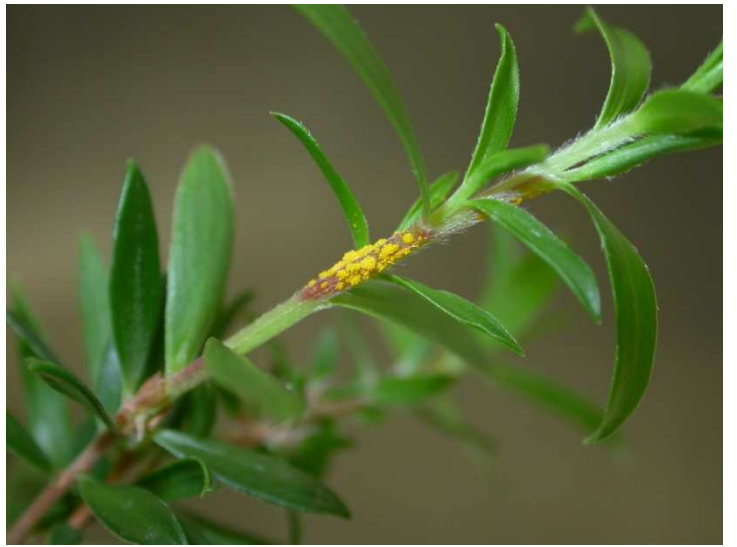

*Leptospermum 'White Wave'*

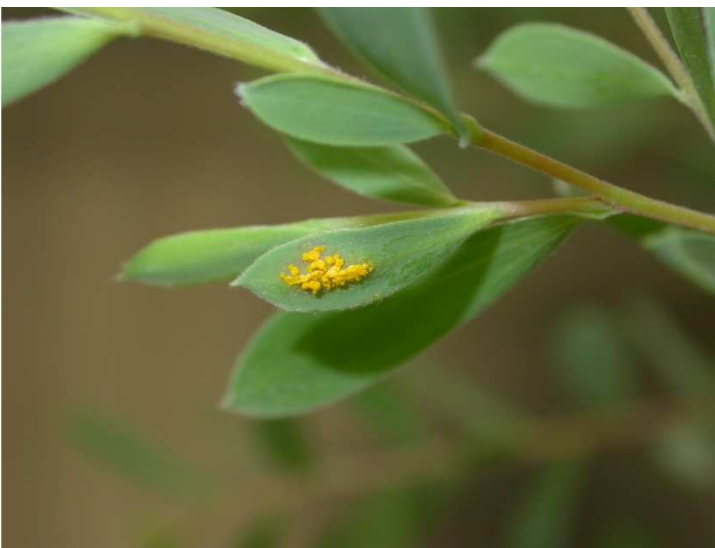

*Leptospermum laevigatum*

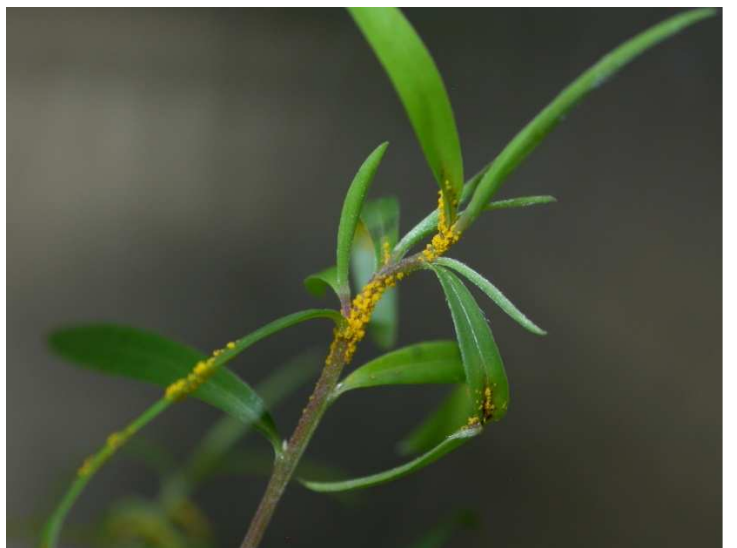

*Leptospermum morrisonii 'Burgundy'*

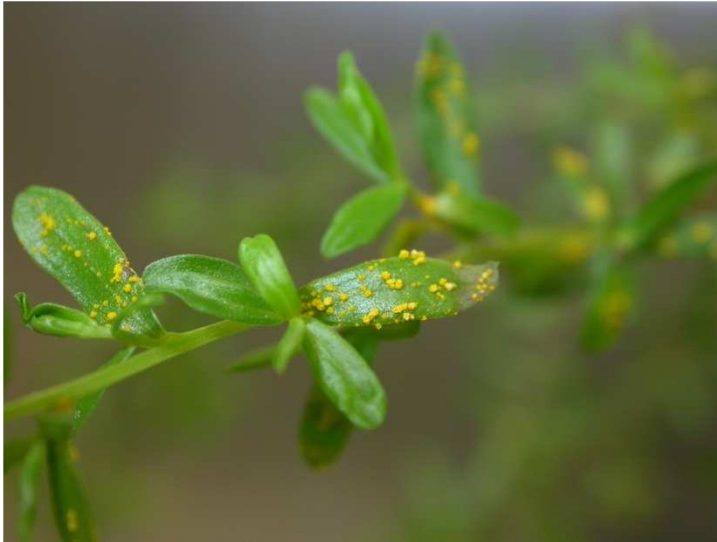

*Leptospermum polygalifolium*

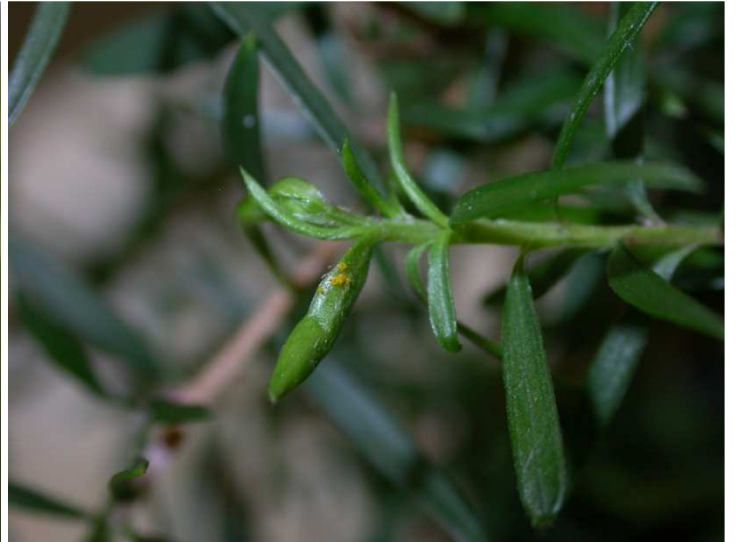

*Leptospermum polygalifolium x scoparium*

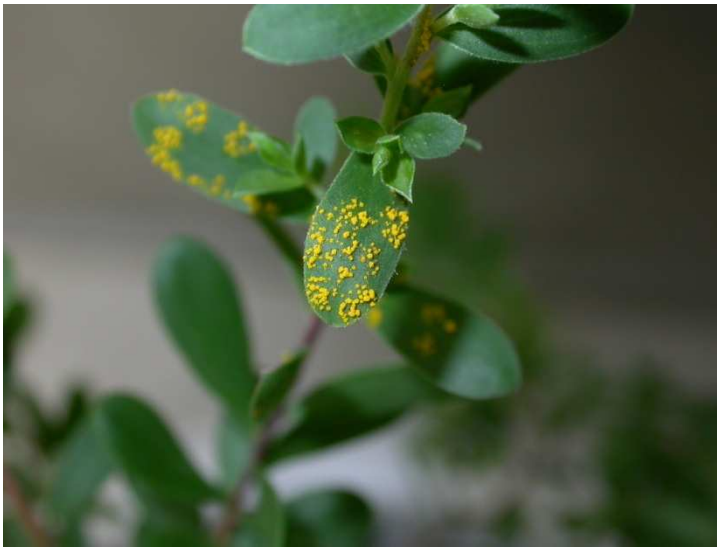

*Leptospermum trinervium*

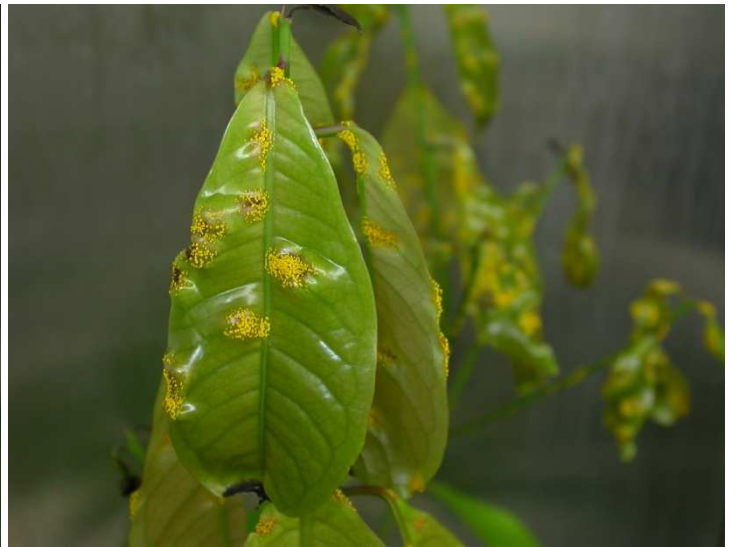

*Lindsayomyrtus racemoides*

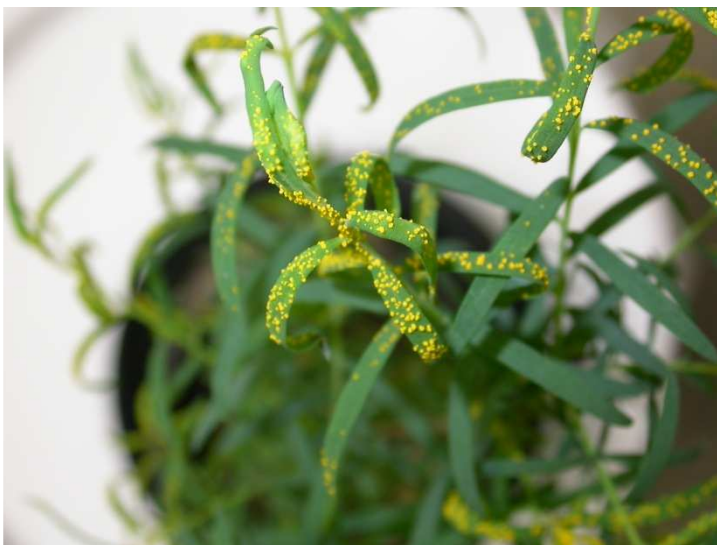

*Melaleuca alternifolia*

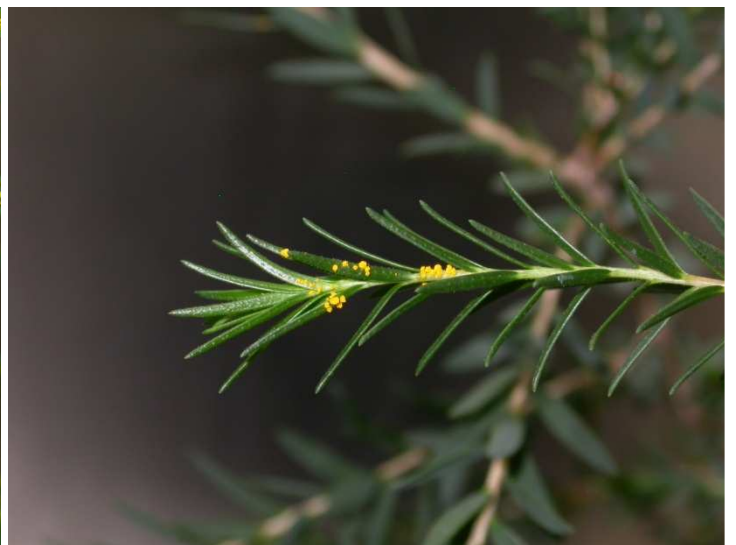

*Melaleuca ericifolia*

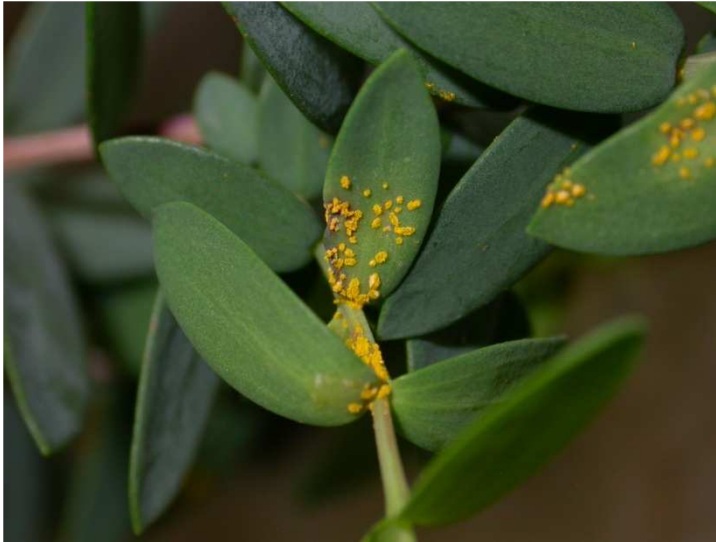

*Melaleuca howeana*

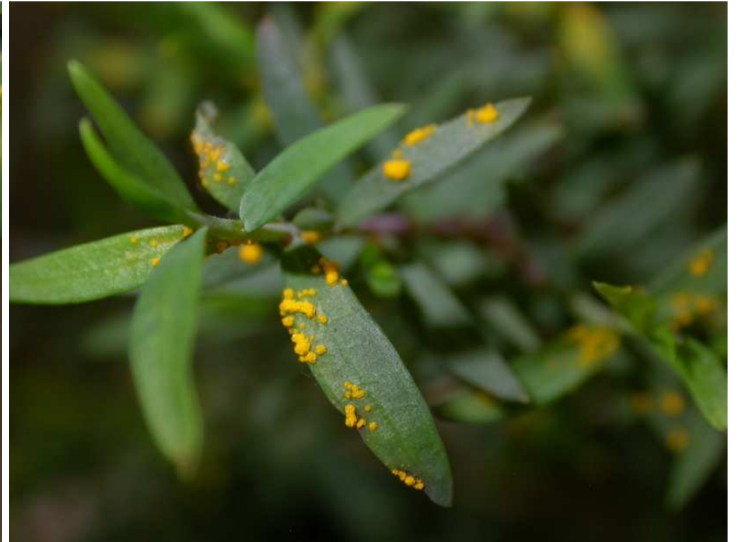

*Melaleuca linariifolia*

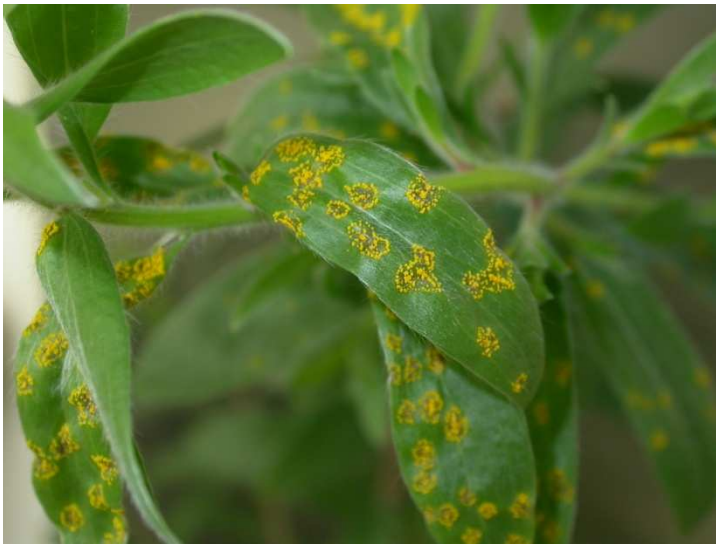

*Melaleuca quinquenervia*

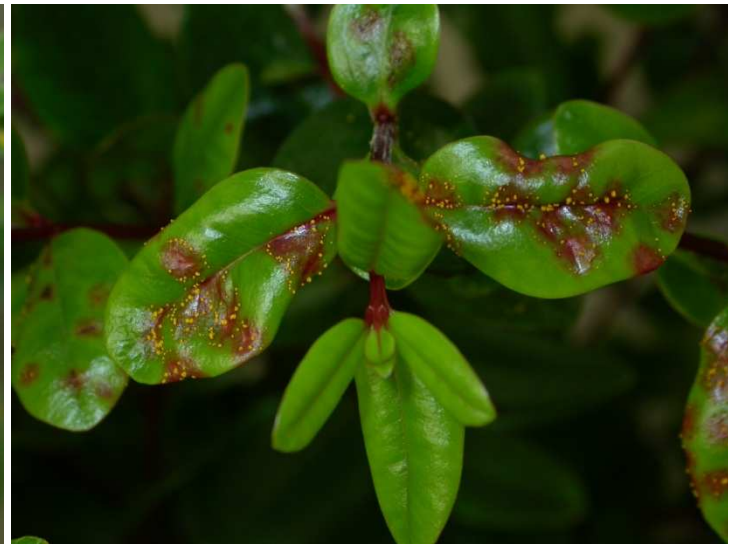

*Metrosideros collina* 'Tahiti'

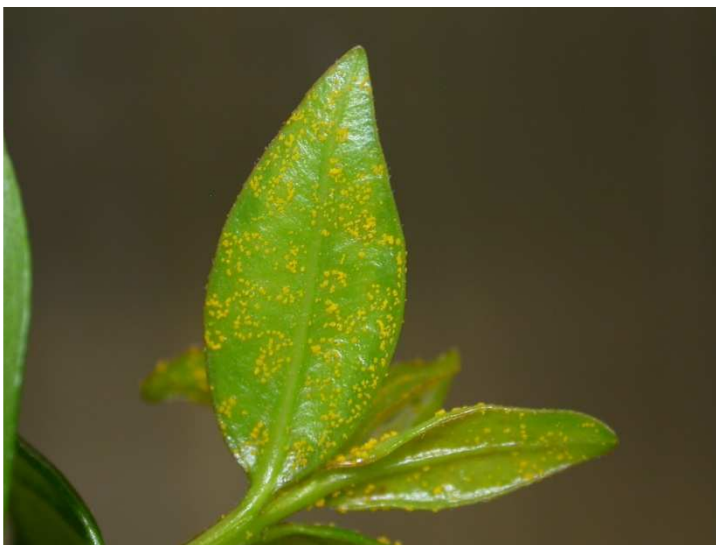

*Metrosideros excelsa* 'Golden Dawn'

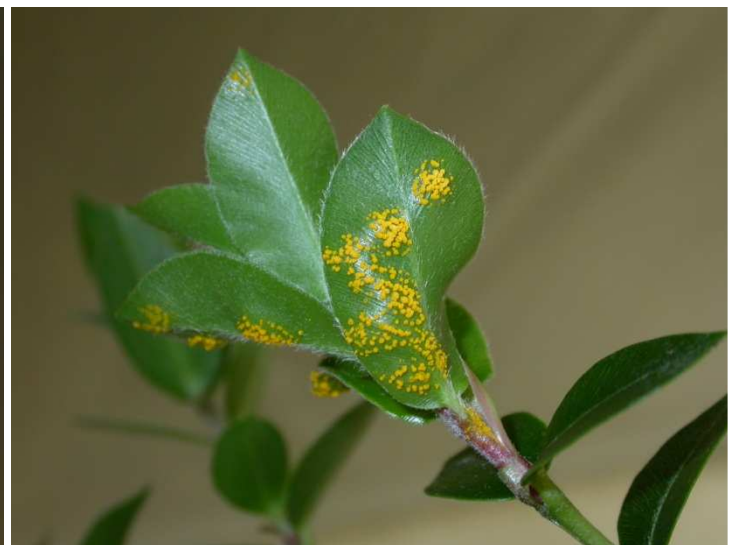

*Metrosideros nervulosa*



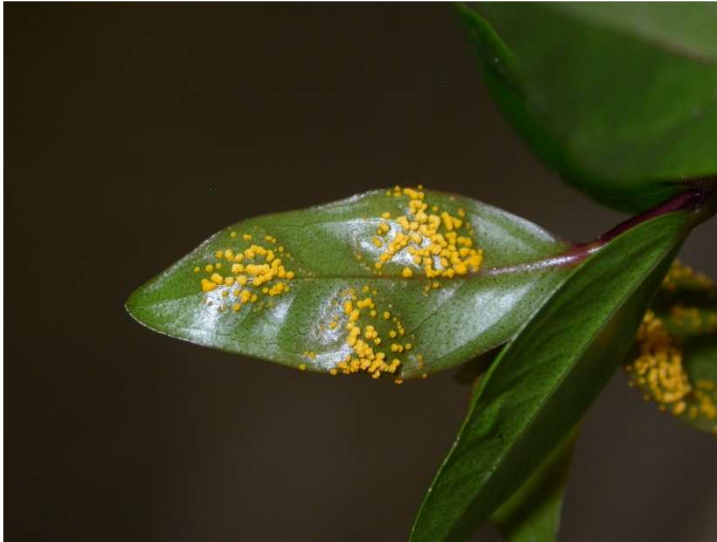

*Metrosideros sclerocarpa*

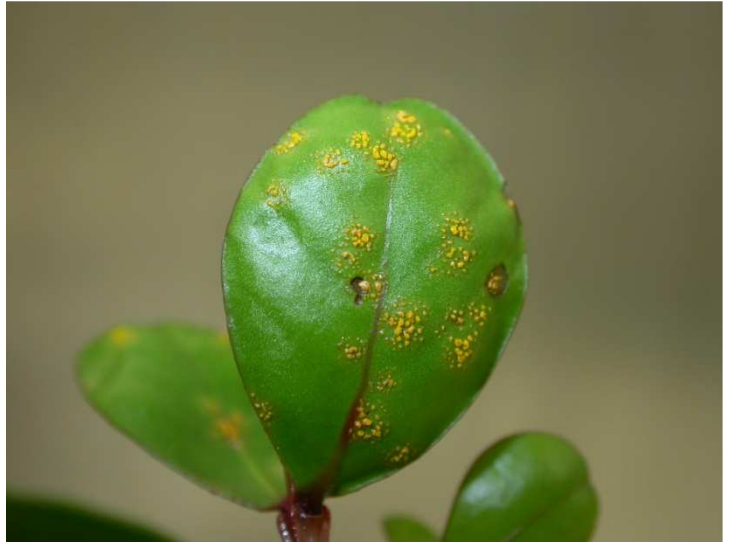

*Osbornia octodonta*

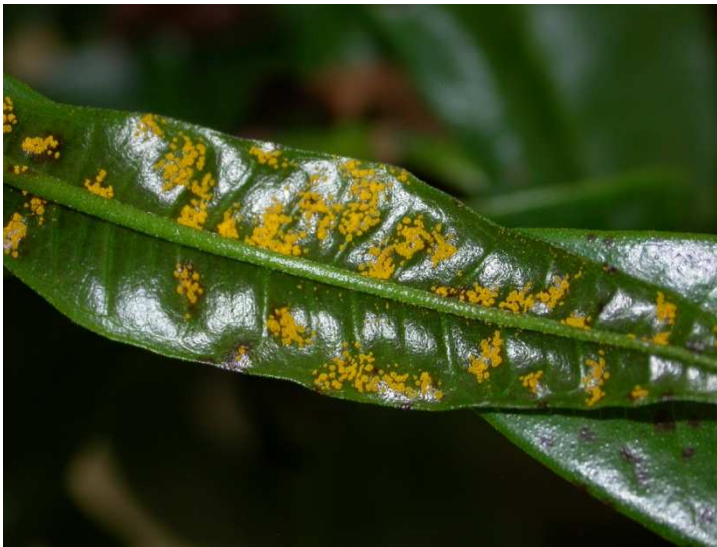

*Pimenta dioica*

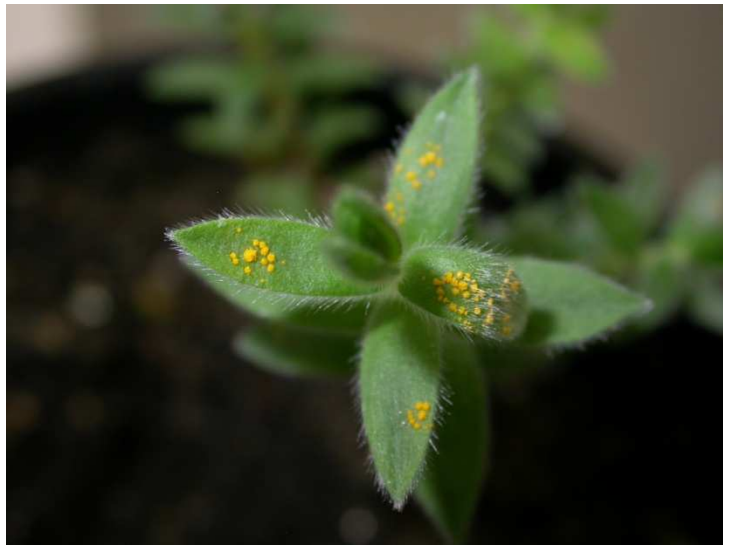

*Regelia velutina*

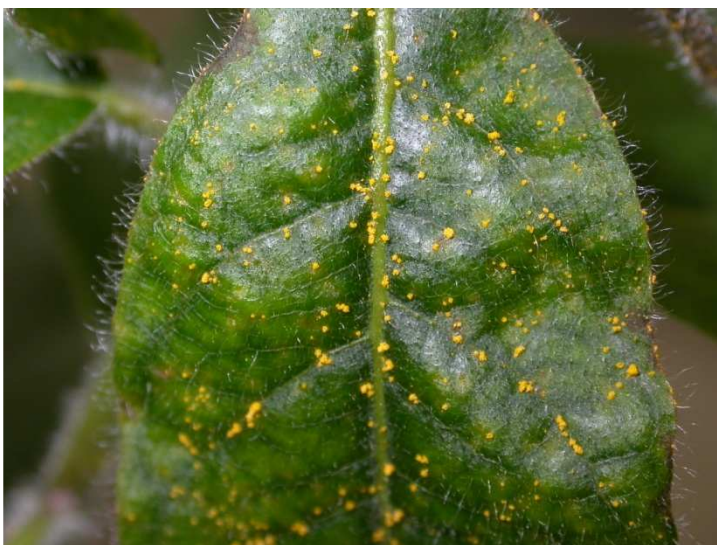

*Syncarpia glomulifera*

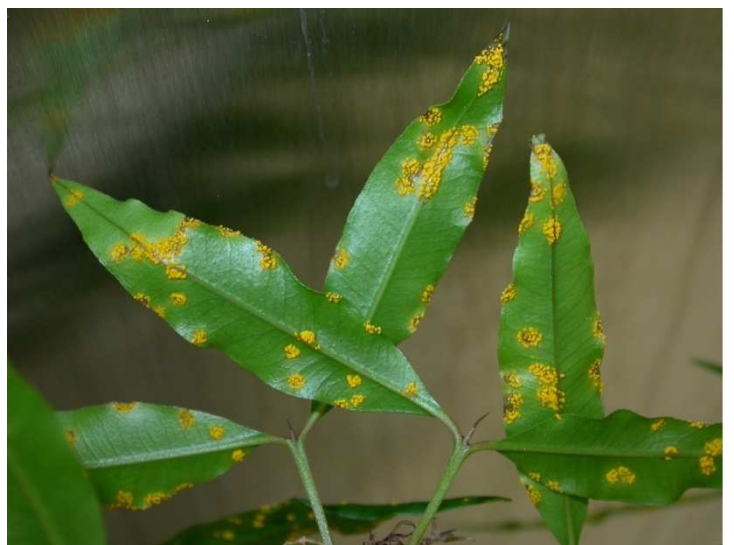

*Syzygium anisatum*

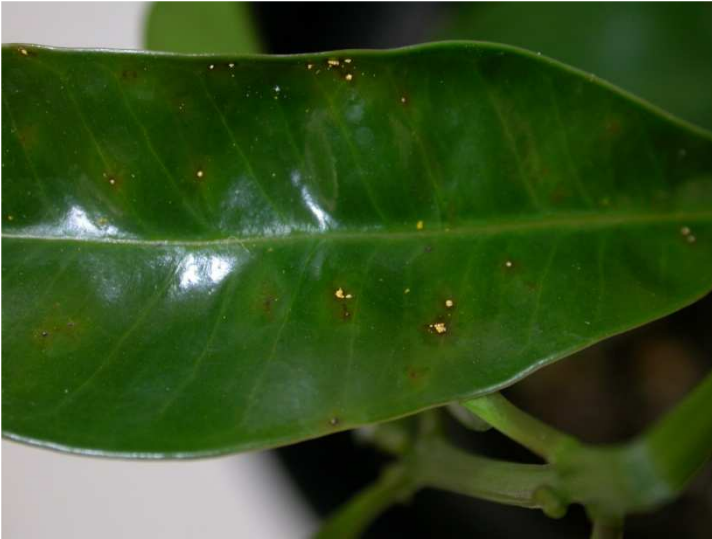

*Syzygium australe* 'Captain Cook'

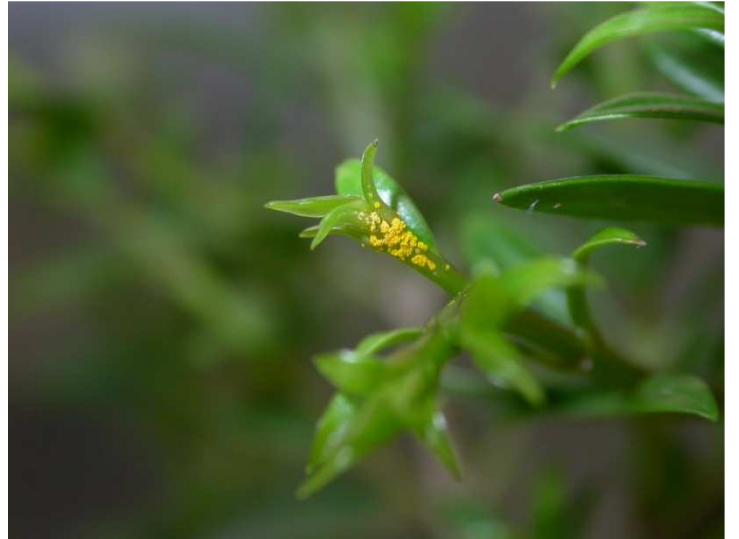

*Syzygium australe* 'Meridian Midget'

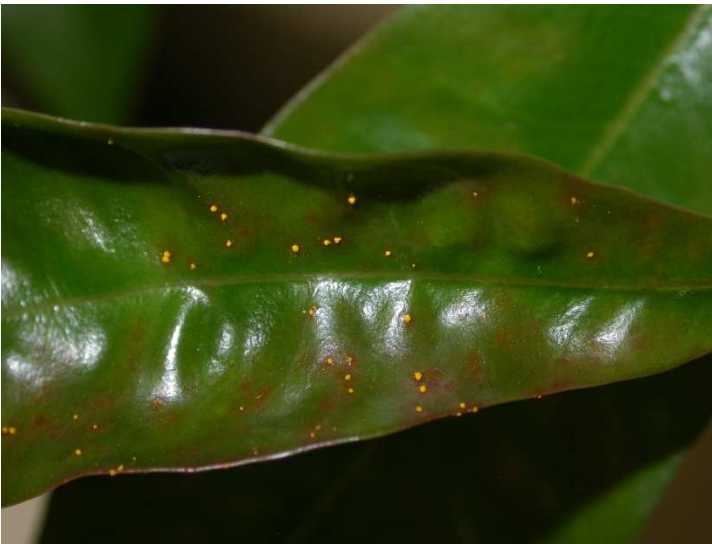

*Syzygium fibrosum*

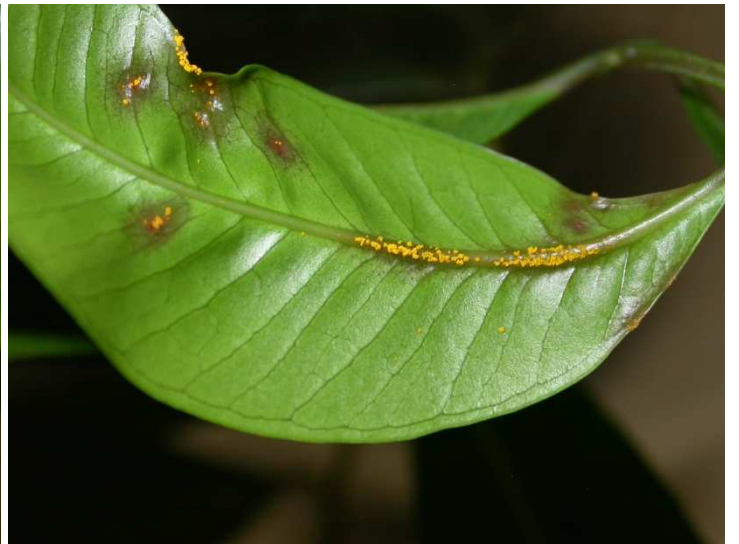

*Syzygium floribundum*

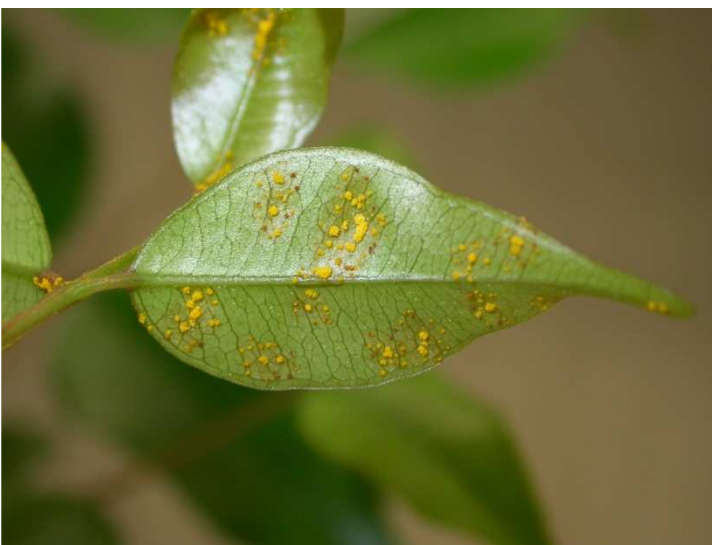

*Syzygium francisii*

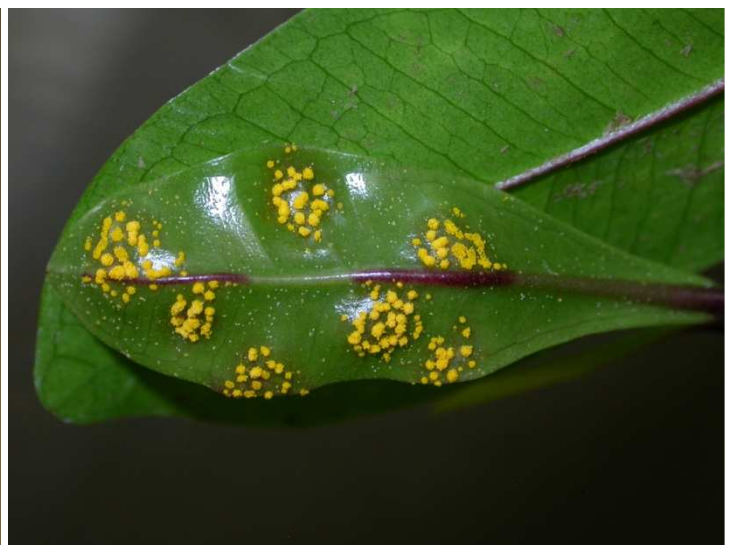

*Syzygium fullagarii*

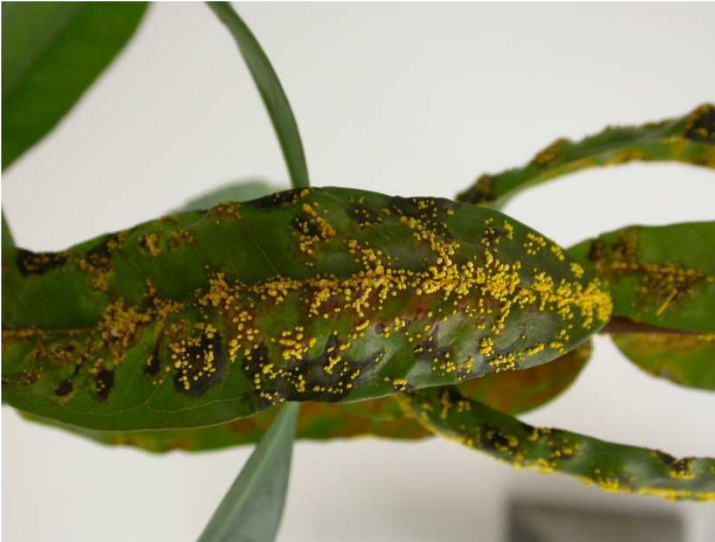

*Syzygium jambos*

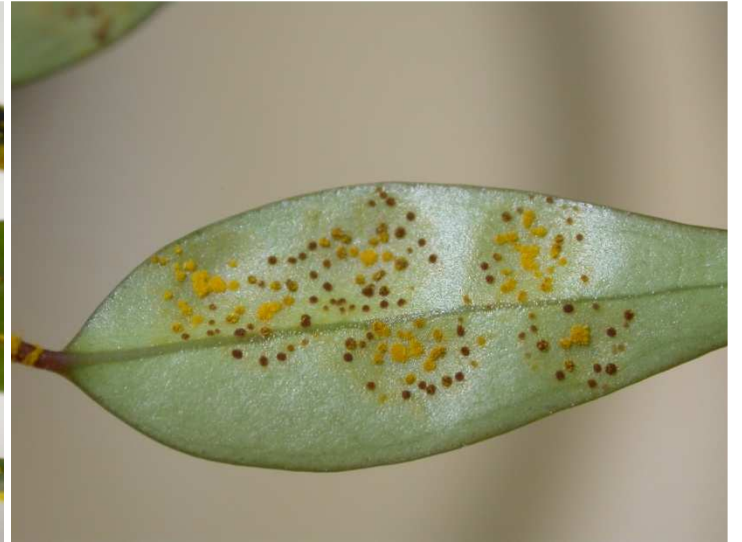

*Syzygium luehmannii*

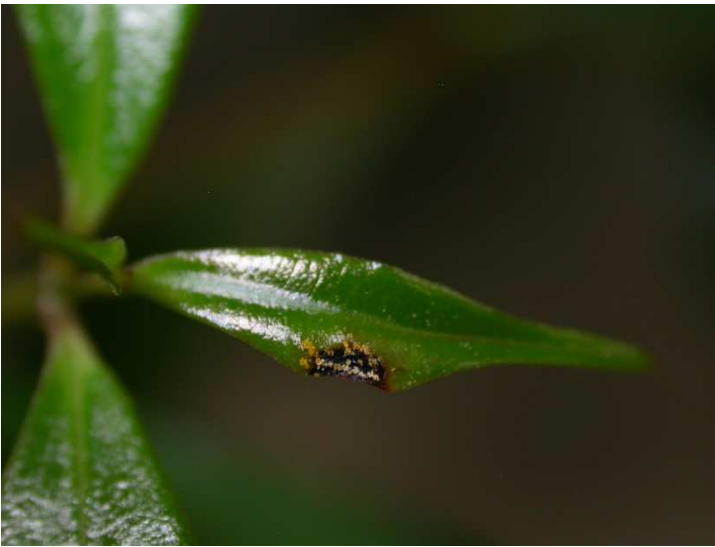

*Syzygium oleosum*

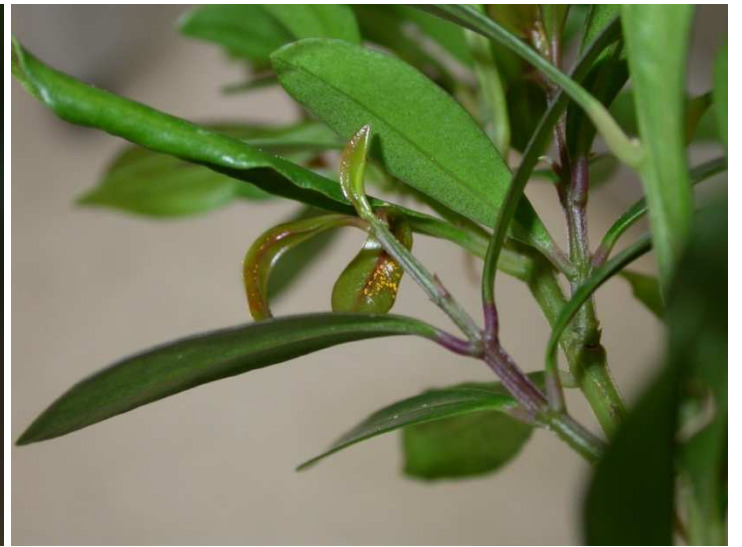

*Syzygium smithii* rheophytic form

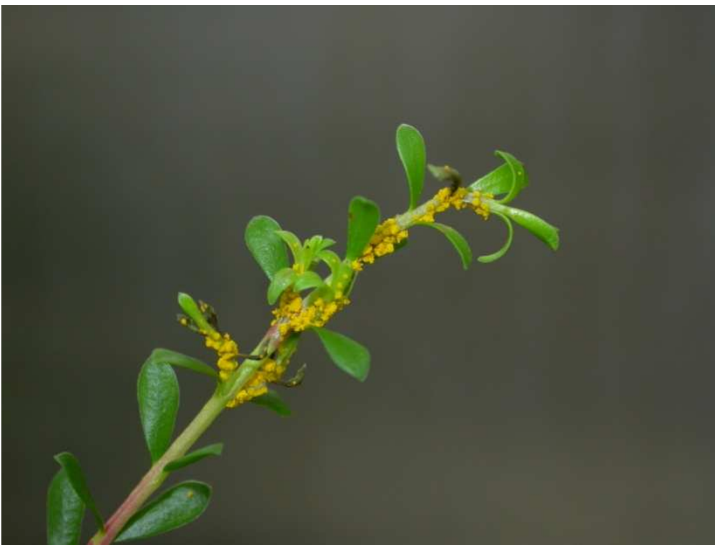

*Thryptomene calycina*

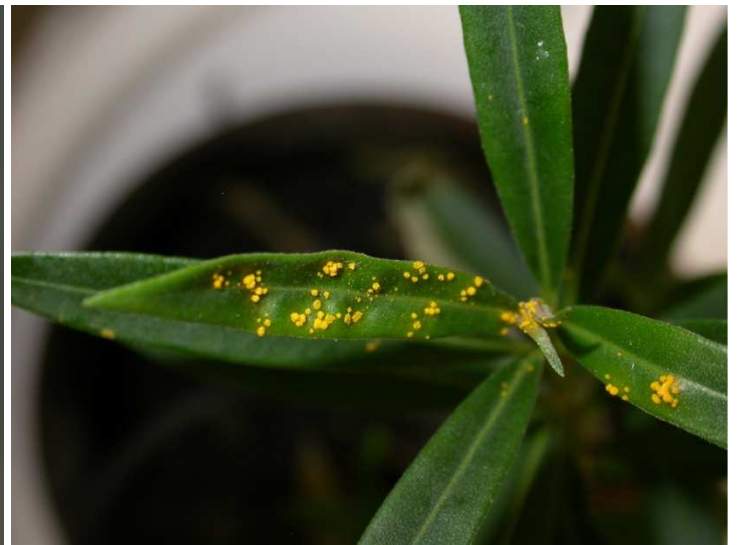

*Tristania neriifolia*

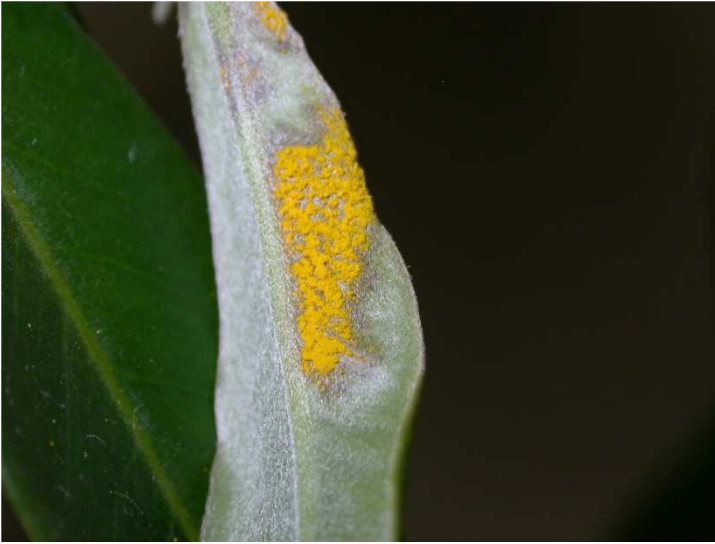

*Tristaniopsis laurina*

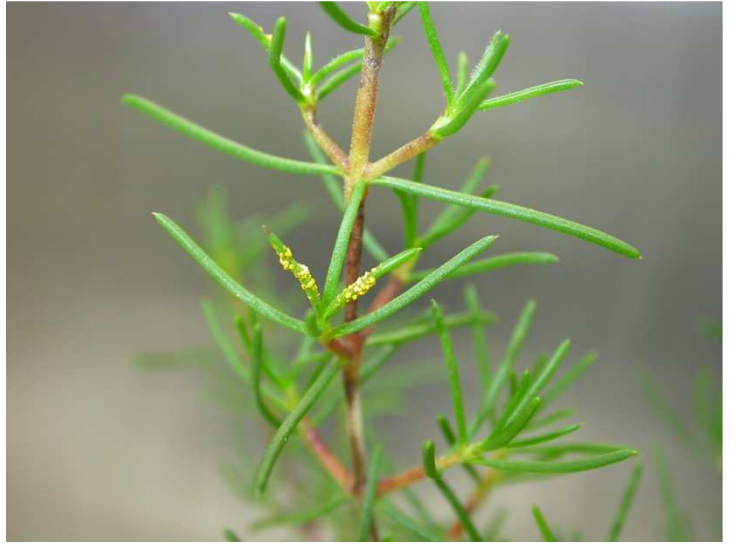

*Verticordia chrysantha*

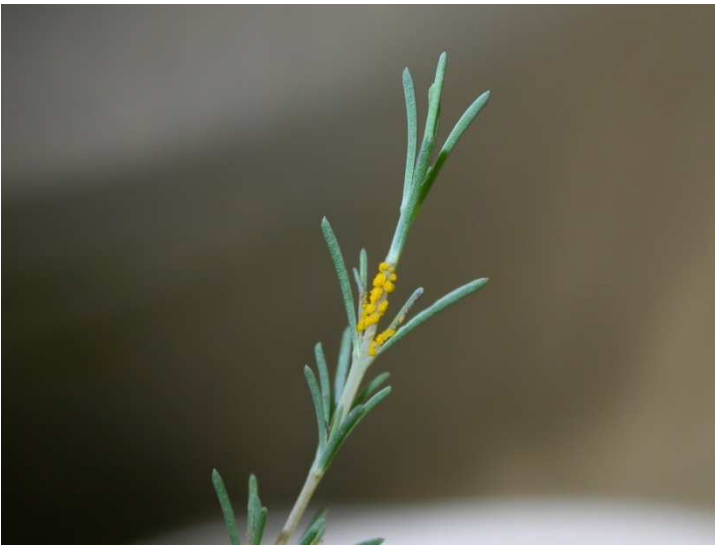

*Verticordia plumosa*

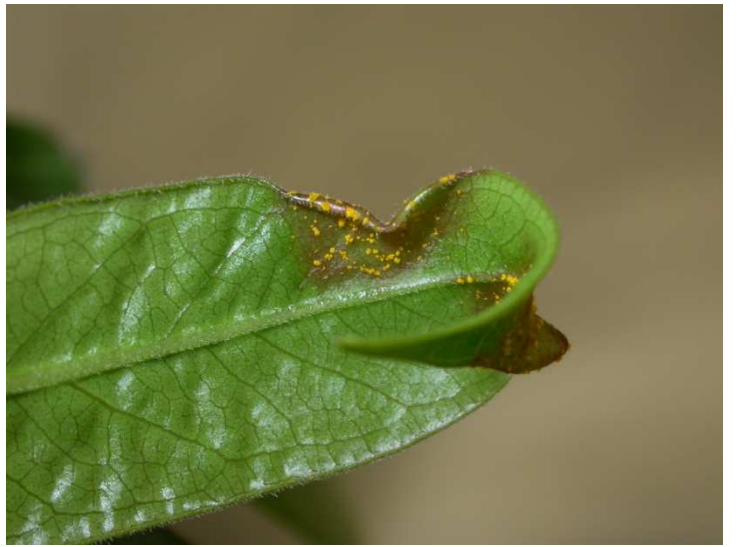

*Xanthostemon chrysanthus*
